# Supplementary material
Source: PubMed Central journal article supplement (PMC4139175)
Supplement: ic500256a_si_001.pdf [file ic500256a_si_001.pdf]

# Supporting Information

## X-ray Absorption Spectroscopy Systematics at the Tungsten

### L-Edge

*Upul Jayarathne,<sup>†,#</sup> Perumalreddy Chandrasekaran,<sup>†,||</sup> Angelique F. Greene,<sup>†</sup> Joel T. Mague,<sup>†</sup>  
Serena DeBeer,<sup>⊥,∇</sup> Kyle M. Lancaster,<sup>⊥</sup> Stephen Sproules,<sup>\*,§</sup> and James P. Donahue<sup>\*,†</sup>*

<sup>†</sup>Department of Chemistry, Tulane University, 6400 Freret Street, New Orleans, Louisiana 70118, United States, <sup>||</sup>Department of Chemistry and Biochemistry, Lamar University, Beaumont, Texas 77710, United States, <sup>⊥</sup>Department of Chemistry and Chemical Biology, Baker Laboratory, Cornell University, Ithaca, New York 14853, United States, <sup>∇</sup>Max-Planck-Institut für Chemische Energiekonversion, Stiftstrasse 34-36, D-45470, Mülheim an der Ruhr, Germany, and <sup>§</sup>WestCHEM, School of Chemistry, University of Glasgow, Glasgow G12 8QQ, United Kingdom

<sup>#</sup>Present address: Department of Chemistry, University of Illinois at Chicago, 845 West Taylor Street, MC 111, Chicago, Illinois 60607, United States

E-mail: stephen.sproules@glasgow.ac.uk; donahue@tulane.edu

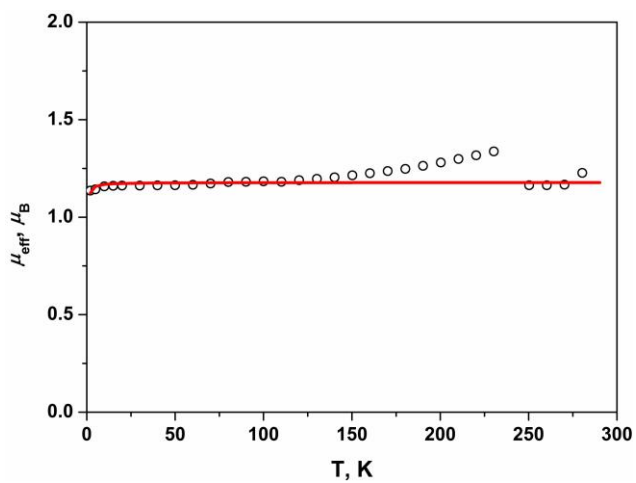

**Figure S1.** Temperature dependence of the magnetic moment,  $\mu_{\text{eff}}, \mu_{\text{B}}$ , of powdered sample of  $[\text{W}^{\text{III}}\text{Cl}_2(\text{dppe})_2][\text{PF}_6]$  measured in a 1 T external field. Experimental data are shown as filled circles, and the red line indicates a best fit:  $S = 1/2$ ;  $g = 1.35$ ;  $\text{TIP} = -157 \times 10^{-6} \text{ cm}^3 \text{ mol}^{-1}$ ;  $\theta_{\text{W}} = -0.09 \text{ K}$ .

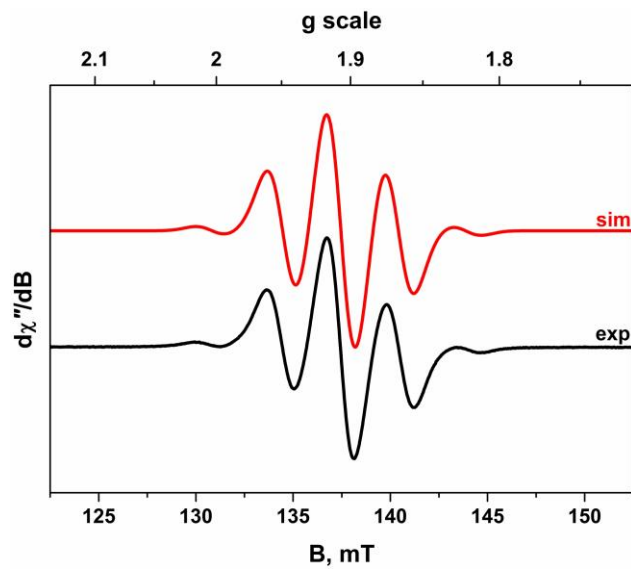

**Figure S2.** S-band EPR spectrum of  $[W^V(NPh)Cl_3(PMe_3)_2]$  recorded in  $CH_2Cl_2/THF$  solution at 190 K (experimental conditions: frequency, 3.6684 GHz; power 2.0 mW; modulation, 0.5 mT). Experimental data are depicted by the black line and simulation in red:  $g_{iso} = 1.903$ ;  $A_W = 60 \times 10^{-4} \text{ cm}^{-1}$ ;  $A_P = 26 \times 10^{-4} \text{ cm}^{-1}$ .

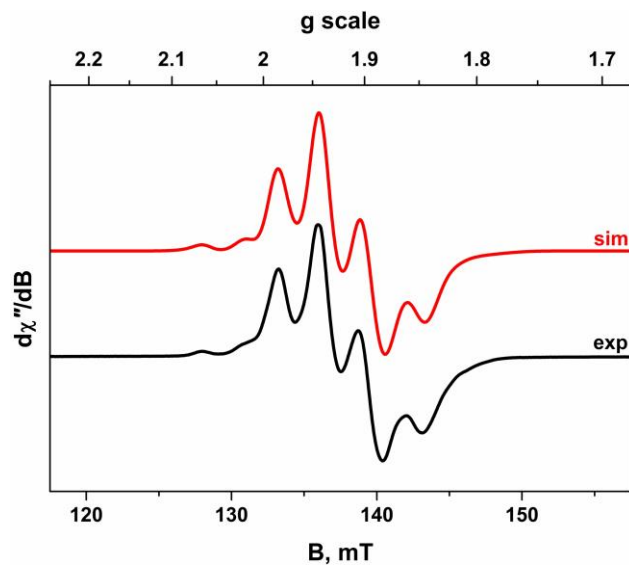

**Figure S3.** S-band EPR spectrum of  $[\text{W}^{\text{V}}(\text{NPh})\text{Cl}_3(\text{PMe}_3)_2]$  recorded in  $\text{CH}_2\text{Cl}_2/\text{THF}$  solution at 30 K (experimental conditions: frequency, 3.7005 GHz; power 0.2 mW; modulation, 0.2 mT). Experimental data are depicted by the black line and simulation in red:  $g = (1.9372, 1.9066, 1.8829)$ ;  $A_{\text{W}} = (91, 116, -25) \times 10^{-4} \text{ cm}^{-1}$ ;  $A_{\text{P}} = (25, 28, 25) \times 10^{-4} \text{ cm}^{-1}$ .

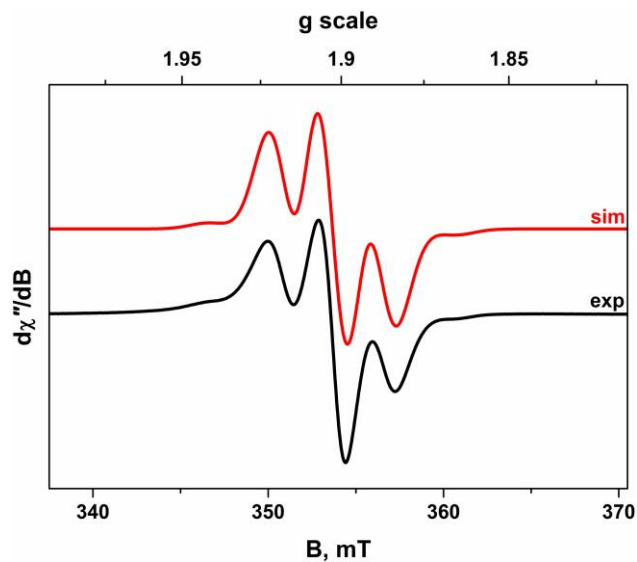

**Figure S4.** X-band EPR spectrum of  $[\text{W}^{\text{V}}(\text{NPh})\text{Cl}_3(\text{PMe}_3)_2]$  recorded in  $\text{CH}_2\text{Cl}_2/\text{THF}$  solution at 190 K (experimental conditions: frequency, 9.4182 GHz; power 0.2 mW; modulation, 0.2 mT). Experimental data are depicted by the black line and simulation in red:  $g_{\text{iso}} = 1.903$ ;  $A_{\text{W}} = 60 \times 10^{-4} \text{ cm}^{-1}$ ;  $A_{\text{P}} = 26 \times 10^{-4} \text{ cm}^{-1}$ .

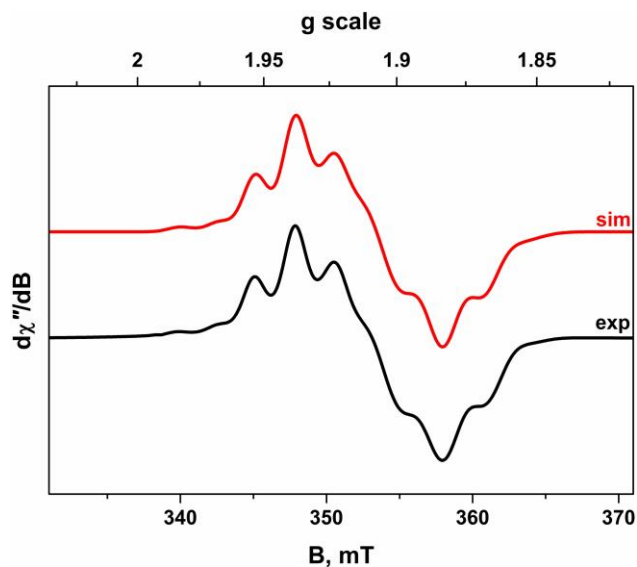

**Figure S5.** X-band EPR spectrum of  $[\text{W}^{\text{V}}(\text{NPh})\text{Cl}_3(\text{PMe}_3)_2]$  recorded in  $\text{CH}_2\text{Cl}_2/\text{THF}$  solution at 30 K (experimental conditions: frequency, 9.4352 GHz; power 0.006 mW; modulation, 0.5 mT). Experimental data are depicted by the black line and simulation in red:  $g = (1.9372, 1.9066, 1.8829)$ ;  $A_{\text{W}} = (91, 116, -25) \times 10^{-4} \text{ cm}^{-1}$ ;  $A_{\text{P}} = (25, 28, 25) \times 10^{-4} \text{ cm}^{-1}$ .

**Table S1.** Experimental ( $L_3$  and  $L_2$ -edge) and Calculated Ligand Field Splitting (eV) for Complexes

| Compound                                                         | $L_3$ | $L_2$ | Calcd |
|------------------------------------------------------------------|-------|-------|-------|
| $[\text{W}^{\text{II}}\text{Cl}_2(\text{PMePh}_2)_4]$            | 2.3   | 2.2   | 2.9   |
| $[\text{W}^{\text{III}}\text{Cl}_2(\text{dppe})_2][\text{PF}_6]$ | 3.6   | 3.3   | 3.7   |
| $[\text{W}^{\text{IV}}\text{Cl}_4(\text{PMePh}_2)_2]$            | 3.0   | 2.7   | 3.3   |
| $[\text{W}^{\text{V}}(\text{NPh})\text{Cl}_3(\text{PMe}_3)_2]$   | 1.1   | 1.6   | 1.6   |
| $[\text{W}^{\text{VI}}\text{Cl}_6]$                              | 3.3   | 3.4   | 3.3   |

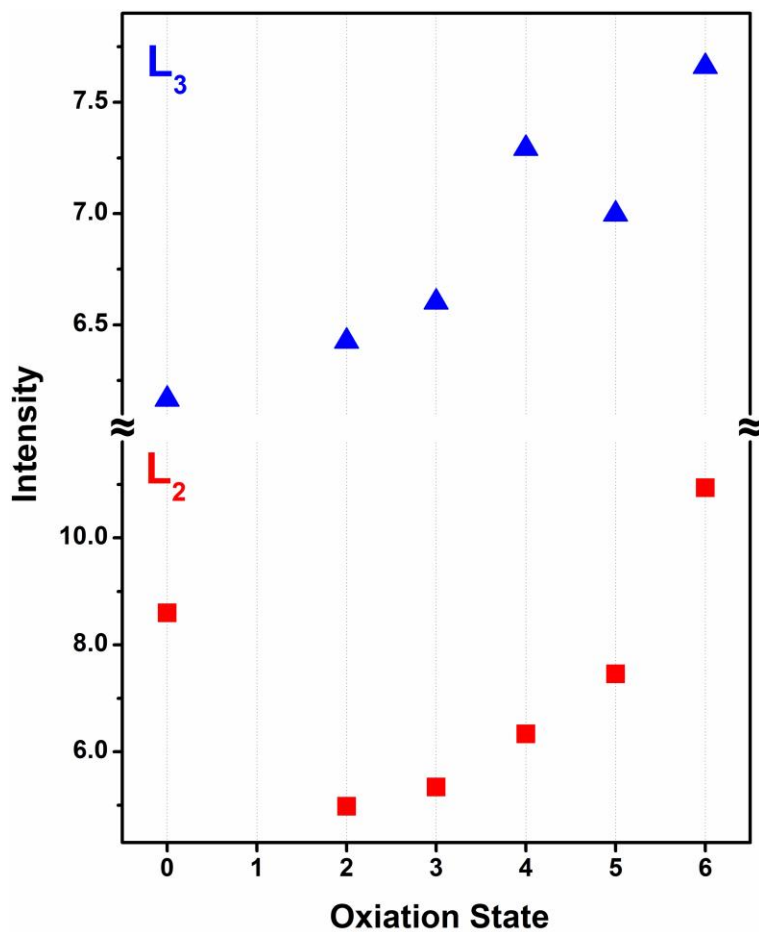

**Figure S6.** Comparison of the L<sub>3</sub>- (▲) and L<sub>2</sub>-edge (■) intensities of the six reference compounds [W<sup>0</sup>(PMe<sub>3</sub>)<sub>6</sub>], [W<sup>II</sup>Cl<sub>2</sub>(PMePh<sub>2</sub>)<sub>4</sub>], [W<sup>III</sup>Cl<sub>2</sub>(dppe)<sub>2</sub>][PF<sub>6</sub>], [W<sup>IV</sup>Cl<sub>4</sub>(PMePh<sub>2</sub>)<sub>2</sub>], [W<sup>V</sup>(NPh)Cl<sub>3</sub>(PMe<sub>3</sub>)<sub>2</sub>], and [W<sup>VI</sup>Cl<sub>6</sub>].



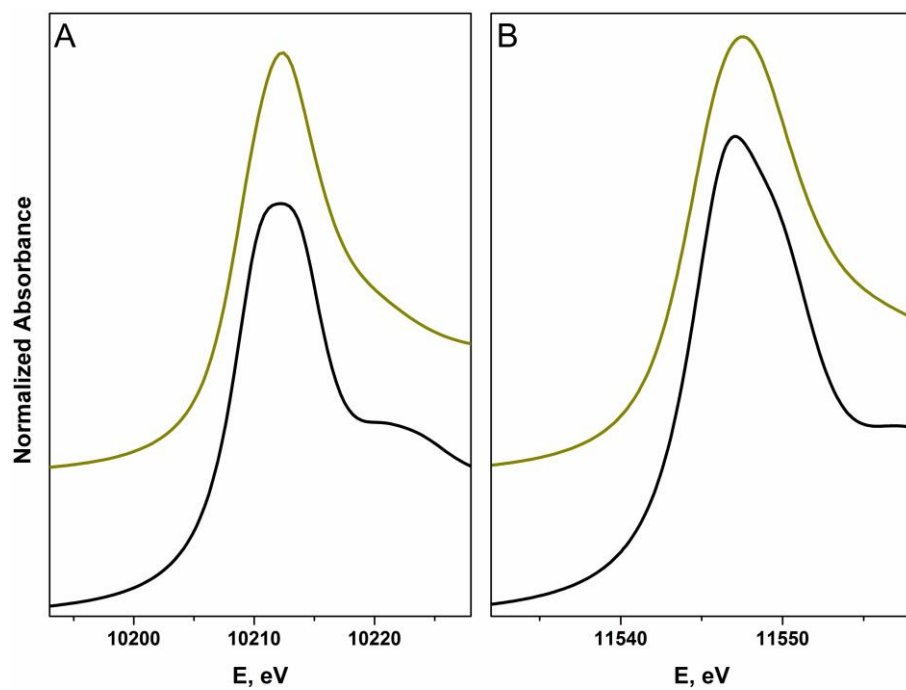

**Figure S7.** Comparison of the normalized W L<sub>3</sub>- (panel A) and L<sub>2</sub>-edge (panel B) X-ray absorption spectra of [W<sup>VI</sup>Cl<sub>6</sub>] (black) and [W<sup>VI</sup>(xylidene)<sub>3</sub>] (dark yellow).

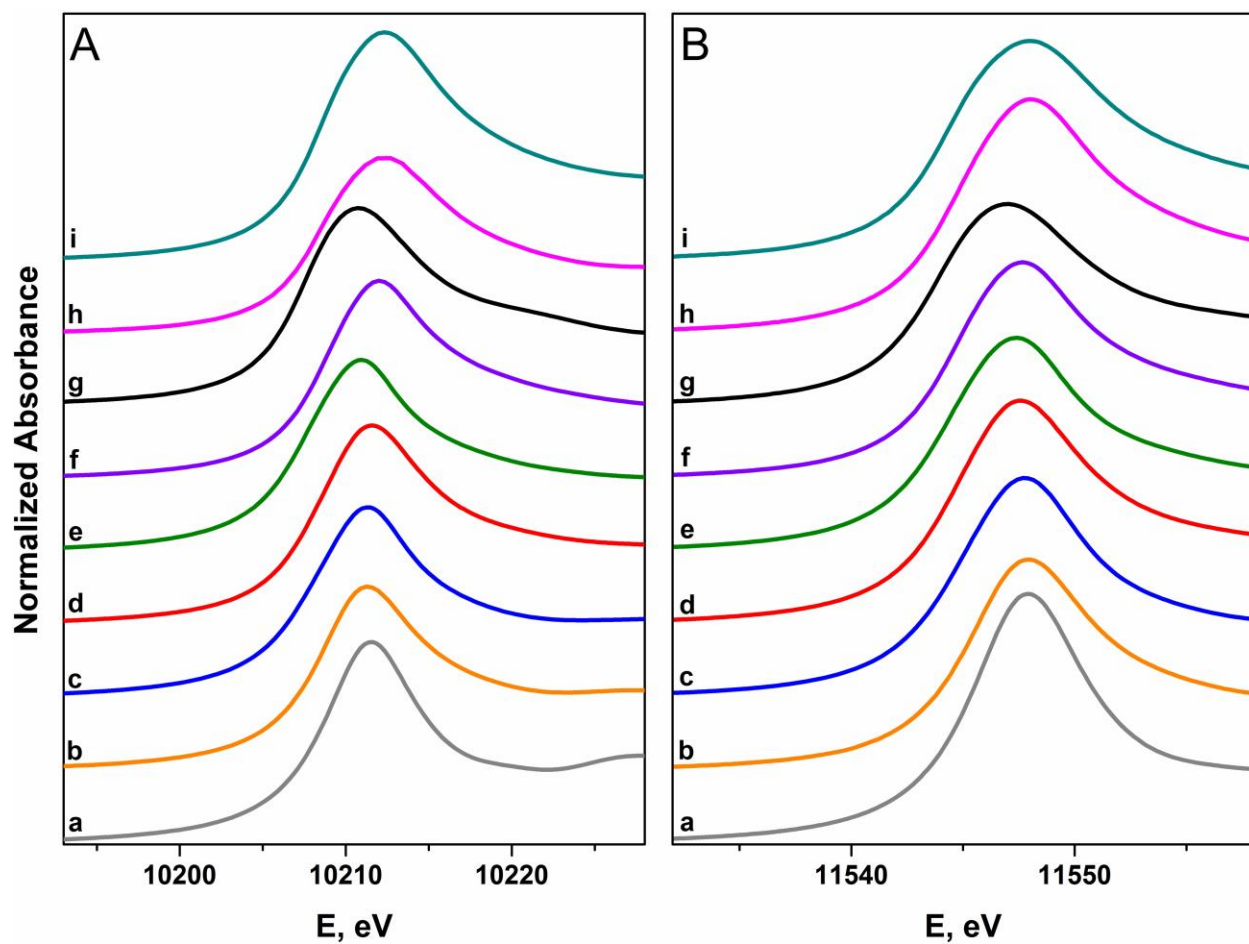

**Figure S8.** Comparison of the normalized W L<sub>3</sub>- (panel A) and L<sub>2</sub>-edge (panel B) X-ray absorption spectra of (a) [W<sup>0</sup>(CO)<sub>6</sub>], (b) [W<sup>0</sup>(Me<sub>2</sub>pipdt)(CO)<sub>4</sub>], (c) [W<sup>II</sup>(mdt)(CO)<sub>4</sub>], (d) [W<sup>II</sup>(mdt)(CO)<sub>2</sub>(PMe<sub>3</sub>)<sub>2</sub>], (e) [W<sup>IV</sup>(mdt)<sub>2</sub>(CO)<sub>2</sub>], (f) [W<sup>IV</sup>(mdt)<sub>2</sub>(CO)(PMe<sub>3</sub>)], (g) [W<sup>IV</sup>(mdt)<sub>2</sub>(PMe<sub>3</sub>)<sub>2</sub>], (h) [W<sup>IV</sup>(mdt)<sub>2</sub>(CN<sup>t</sup>Bu)<sub>2</sub>], (i) [NEt<sub>4</sub>]<sub>2</sub>[W<sup>IV</sup>(mdt)<sub>2</sub>(CN)<sub>2</sub>].

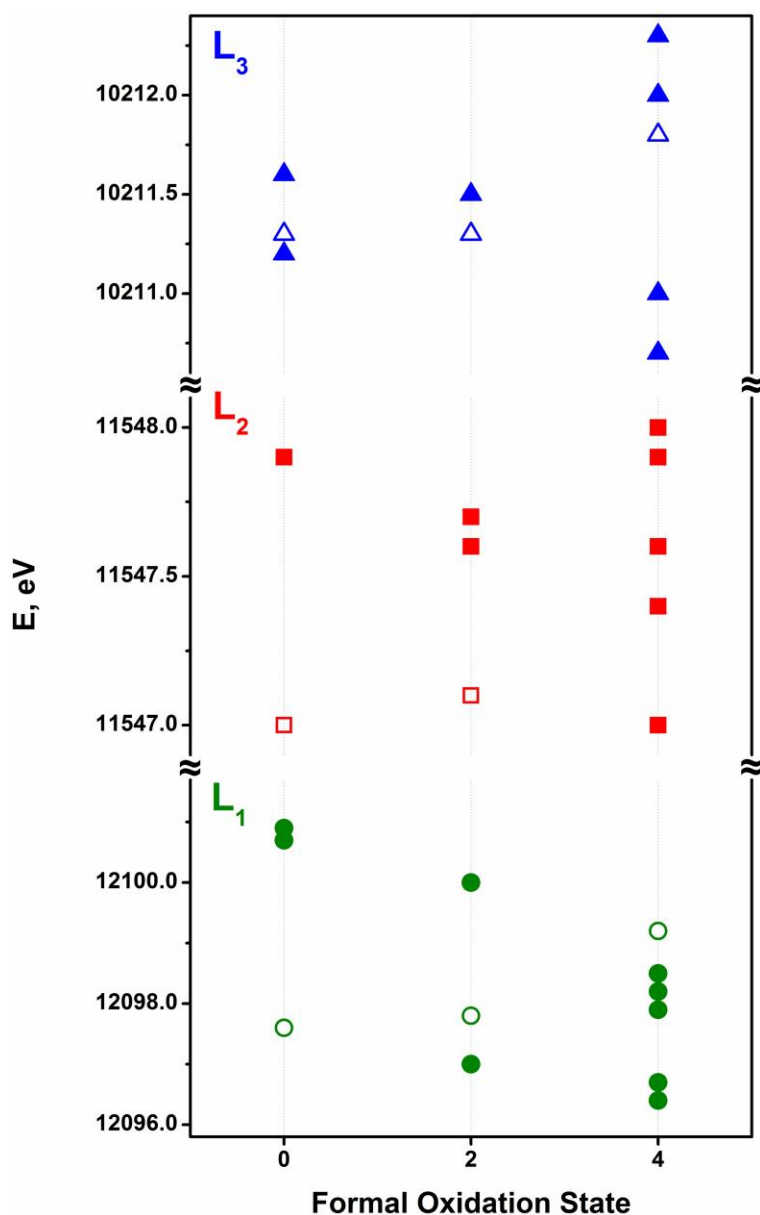

**Figure S9.** Comparison of the L<sub>3</sub>- (▲), L<sub>2</sub>- (■) and L<sub>1</sub>-edge (●) energies of formally W<sup>0</sup> compounds [W<sup>0</sup>(CO)<sub>6</sub>] and [W<sup>0</sup>(Me<sub>2</sub>pipdt)(CO)<sub>4</sub>], W<sup>II</sup> complexes [W<sup>II</sup>(mdt)(CO)<sub>4</sub>] and [W<sup>II</sup>(mdt)(CO)<sub>2</sub>(PMe<sub>3</sub>)<sub>2</sub>], and W<sup>IV</sup> compounds [W<sup>IV</sup>(mdt)<sub>2</sub>(CO)<sub>2</sub>], [W<sup>IV</sup>(mdt)<sub>2</sub>(CO)(PMe<sub>3</sub>)], [W<sup>IV</sup>(mdt)<sub>2</sub>(PMe<sub>3</sub>)<sub>2</sub>], [W<sup>IV</sup>(mdt)<sub>2</sub>(CN<sup>t</sup>Bu)<sub>2</sub>], and [NEt<sub>4</sub>]<sub>2</sub>[W<sup>IV</sup>(mdt)<sub>2</sub>(CN)<sub>2</sub>], with their respective standards, [W<sup>0</sup>(PMe<sub>3</sub>)<sub>6</sub>], [W<sup>II</sup>Cl<sub>2</sub>(PMePh<sub>2</sub>)<sub>4</sub>], and [W<sup>IV</sup>Cl<sub>4</sub>(PMePh<sub>2</sub>)<sub>2</sub>], represented by the open shapes.

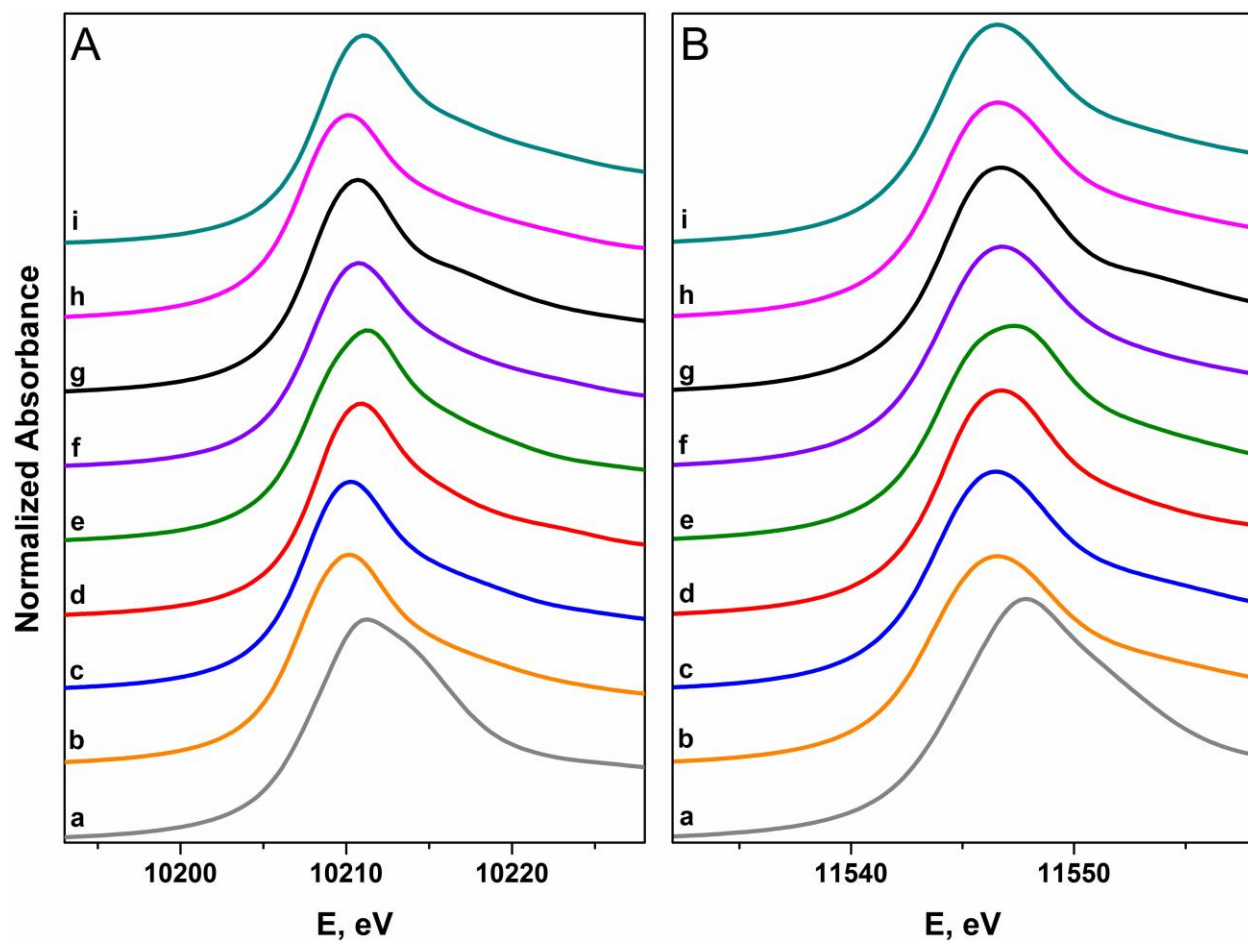

**Figure S10.** Comparison of the normalized W L<sub>3</sub>- (panel A) and L<sub>2</sub>-edge (panel B) X-ray absorption spectra of (a) [PPh<sub>4</sub>]<sub>2</sub>[W<sup>IV</sup>(mnt)<sub>3</sub>], (b) [PPh<sub>4</sub>]<sub>2</sub>[W<sup>IV</sup>(bdt)<sub>3</sub>], (c) [NEt<sub>4</sub>]<sub>2</sub>[W<sup>IV</sup>(bdt)<sub>3</sub>], (d) [NEt<sub>4</sub>]<sub>2</sub>[W<sup>IV</sup>(mdt)<sub>3</sub>], (e) [PPh<sub>4</sub>][W<sup>V</sup>(bdt)<sub>3</sub>], (f) [NEt<sub>4</sub>][W<sup>V</sup>(mdt)<sub>3</sub>], (g) [W<sup>VI</sup>(bdt)<sub>3</sub>], (h) [W<sup>VI</sup>(mdt)<sub>3</sub>], (i) [W<sup>VI</sup>(pdt)<sub>3</sub>].

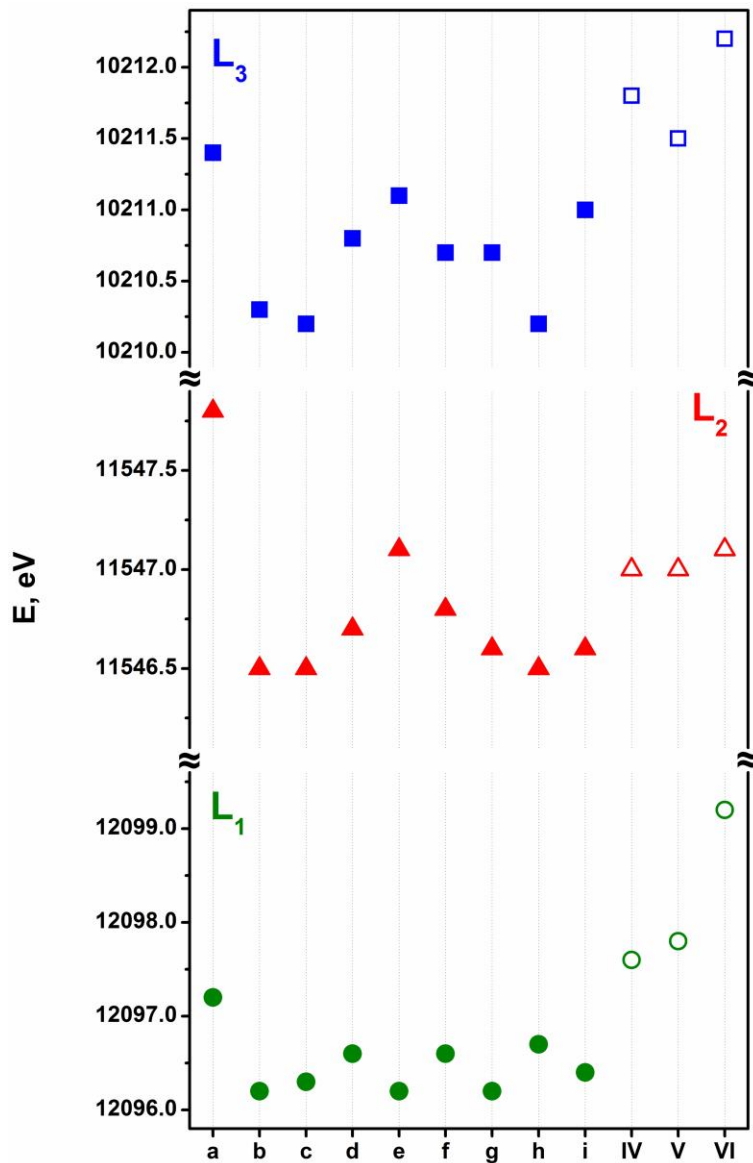

**Figure S11.** Comparison of the L<sub>3</sub>- (■), L<sub>2</sub>- (▲) and L<sub>1</sub>-edge (●) energies of (a) [PPh<sub>4</sub>]<sub>2</sub>[W<sup>IV</sup>(mnt)<sub>3</sub>], (b) [PPh<sub>4</sub>]<sub>2</sub>[W<sup>IV</sup>(bdt)<sub>3</sub>], (c) [NEt<sub>4</sub>]<sub>2</sub>[W<sup>IV</sup>(bdt)<sub>3</sub>], (d) [NEt<sub>4</sub>]<sub>2</sub>[W<sup>IV</sup>(mdt)<sub>3</sub>], (e) [PPh<sub>4</sub>][W<sup>V</sup>(bdt)<sub>3</sub>], (f) [NEt<sub>4</sub>][W<sup>V</sup>(mdt)<sub>3</sub>], (g) [W<sup>VI</sup>(bdt)<sub>3</sub>], (h) [W<sup>VI</sup>(mdt)<sub>3</sub>], (i) [W<sup>VI</sup>(pdt)<sub>3</sub>], with calibrants (IV) [W<sup>IV</sup>Cl<sub>4</sub>(PMePh<sub>2</sub>)<sub>2</sub>], (IV) [W<sup>V</sup>(NPh)Cl<sub>3</sub>(PMe<sub>3</sub>)<sub>2</sub>], (IV) [W<sup>VI</sup>Cl<sub>6</sub>], represented by the open shapes.

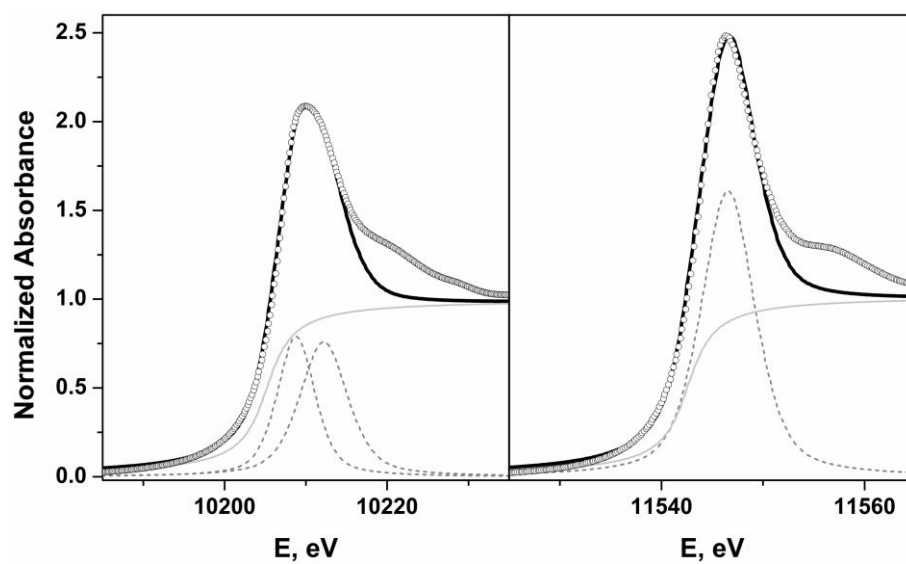

**Figure S12.** Pseudo-Voigt deconvolution of the W L<sub>3</sub>-edge (left) and L<sub>2</sub>-edge (right) spectra of W reference foil.

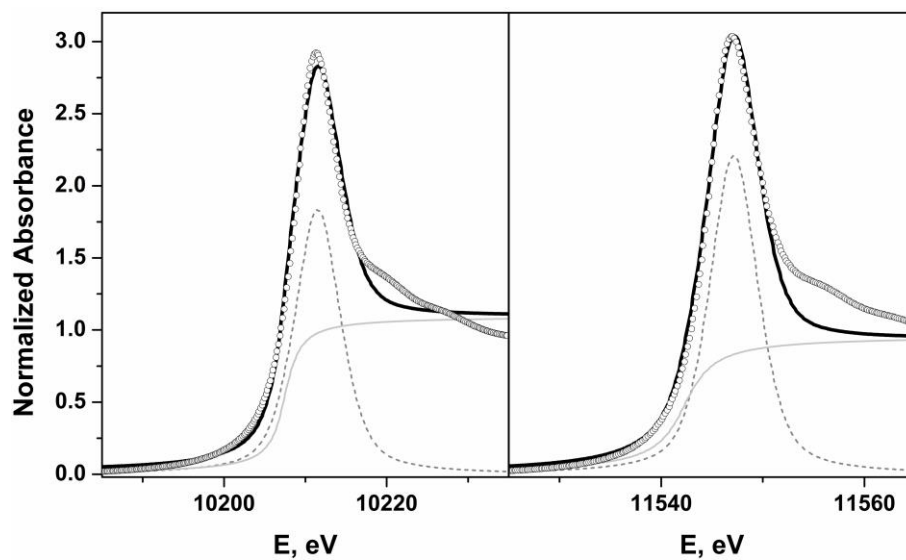

**Figure S13.** Pseudo-Voigt deconvolution of the W L<sub>3</sub>-edge (left) and L<sub>2</sub>-edge (right) spectra of [W<sup>0</sup>(PMe<sub>3</sub>)<sub>6</sub>].

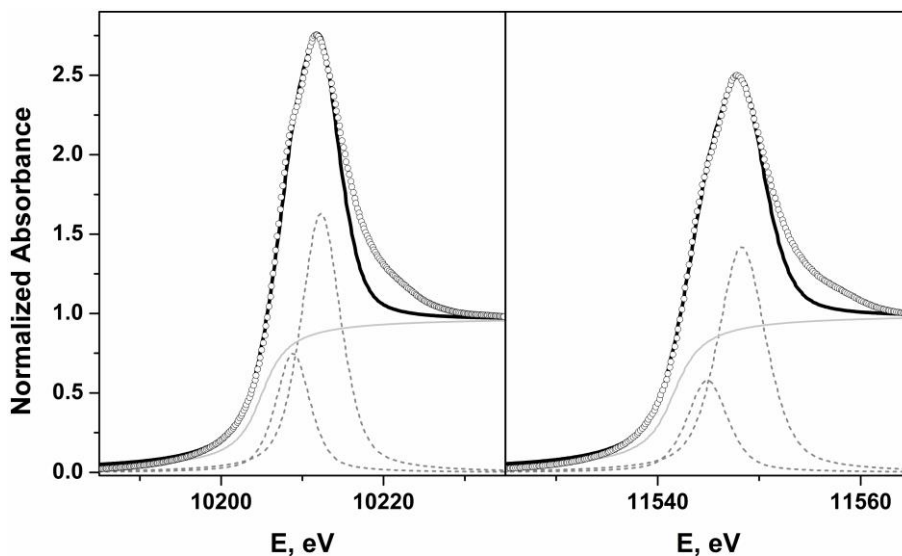

**Figure S14.** Pseudo-Voigt deconvolution of the W L<sub>3</sub>-edge (left) and L<sub>2</sub>-edge (right) spectra of [W<sup>II</sup>Cl<sub>2</sub>(PMePh<sub>2</sub>)<sub>4</sub>].

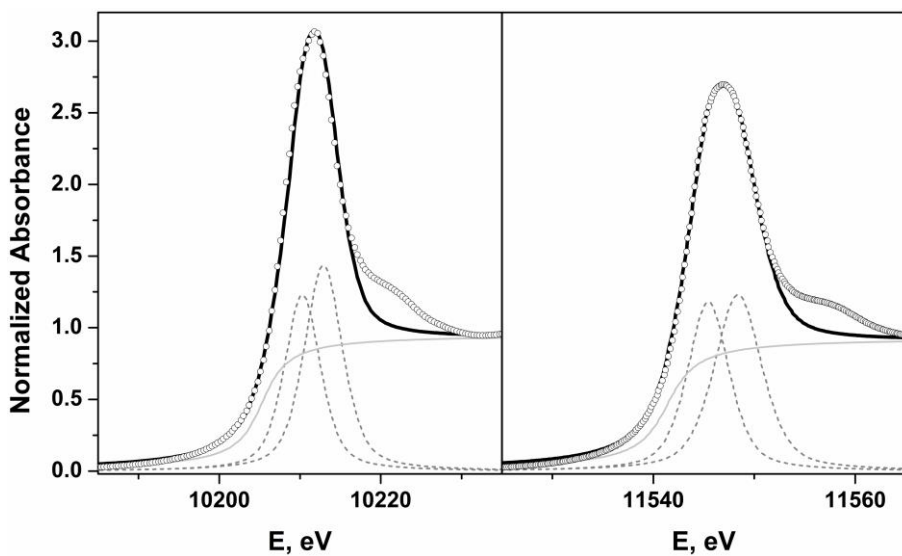

**Figure S15.** Pseudo-Voigt deconvolution of the W L<sub>3</sub>-edge (left) and L<sub>2</sub>-edge (right) spectra of [W<sup>III</sup>Cl<sub>2</sub>(dppe)<sub>2</sub>][PF<sub>6</sub>].

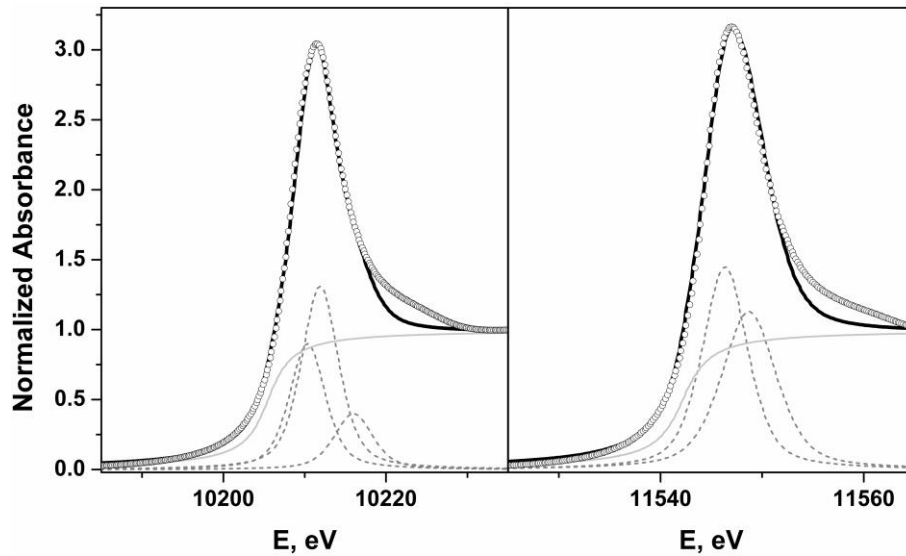

**Figure S16.** Pseudo-Voigt deconvolution of the W L<sub>3</sub>-edge (left) and L<sub>2</sub>-edge (right) spectra of [W<sup>IV</sup>Cl<sub>4</sub>(PMePh<sub>2</sub>)<sub>2</sub>].

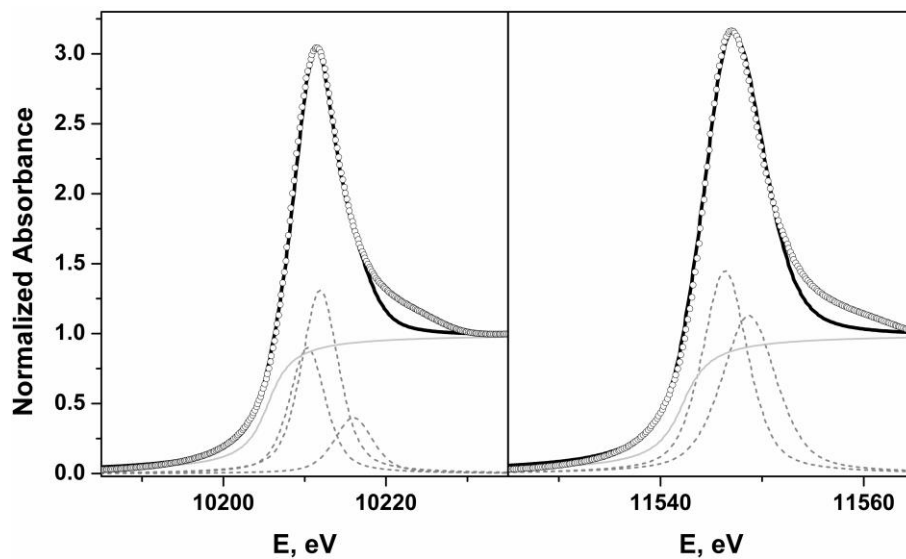

**Figure S17.** Pseudo-Voigt deconvolution of the W L<sub>3</sub>-edge (left) and L<sub>2</sub>-edge (right) spectra of [W<sup>V</sup>(NPh)Cl<sub>3</sub>(PMe<sub>3</sub>)<sub>2</sub>].



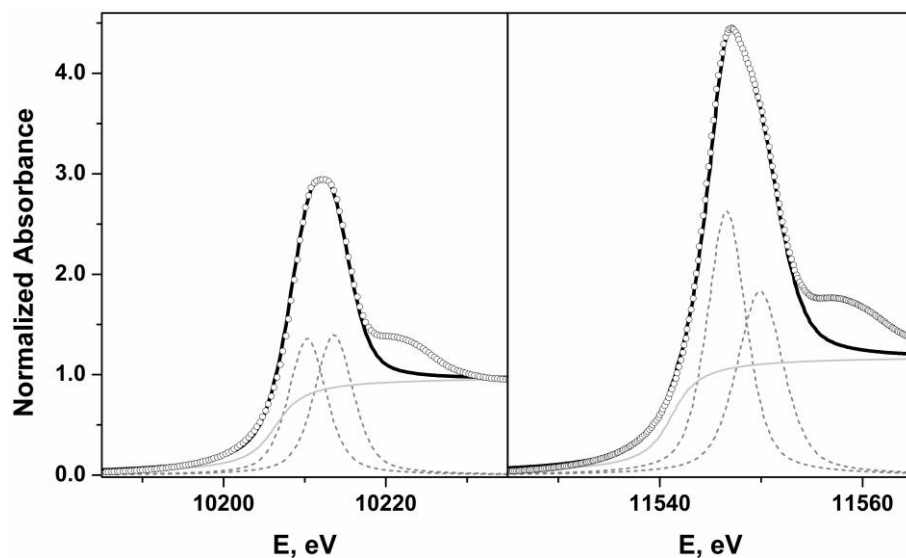

**Figure S18.** Pseudo-Voigt deconvolution of the W L<sub>3</sub>-edge (left) and L<sub>2</sub>-edge (right) spectra of [W<sup>VI</sup>Cl<sub>6</sub>].

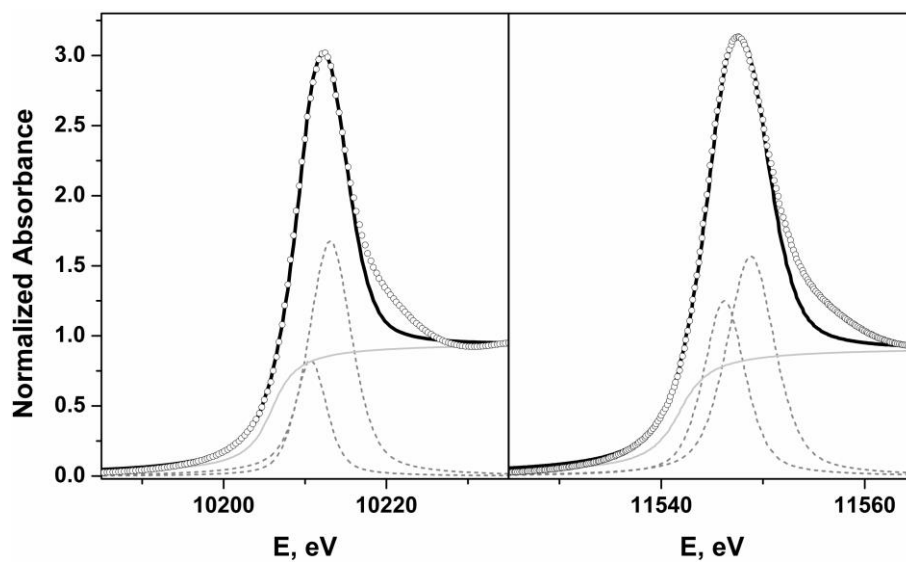

**Figure S19.** Pseudo-Voigt deconvolution of the W L<sub>3</sub>-edge (left) and L<sub>2</sub>-edge (right) spectra of [W<sup>VI</sup>(xylidene)<sub>3</sub>].

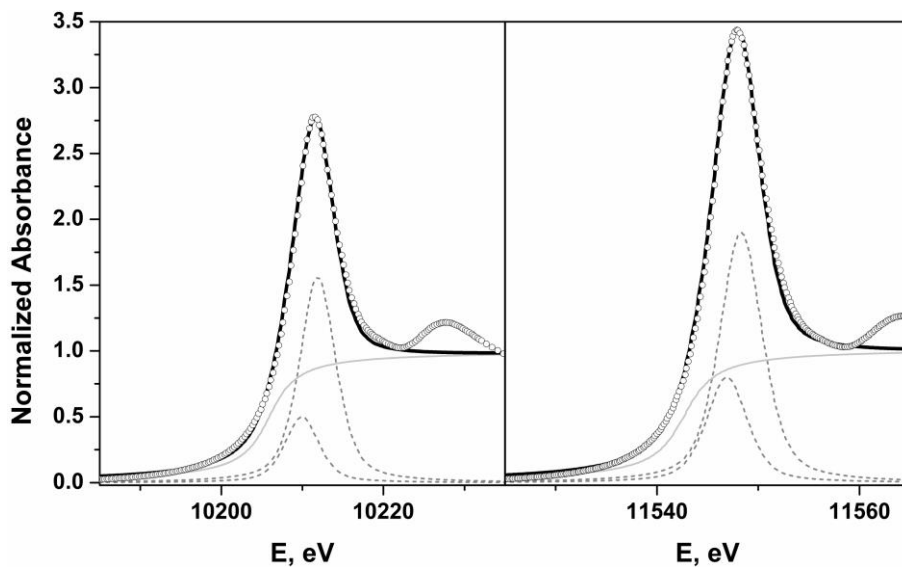

**Figure S20.** Pseudo-Voigt deconvolution of the W L<sub>3</sub>-edge (left) and L<sub>2</sub>-edge (right) spectra of [W<sup>0</sup>(CO)<sub>6</sub>].

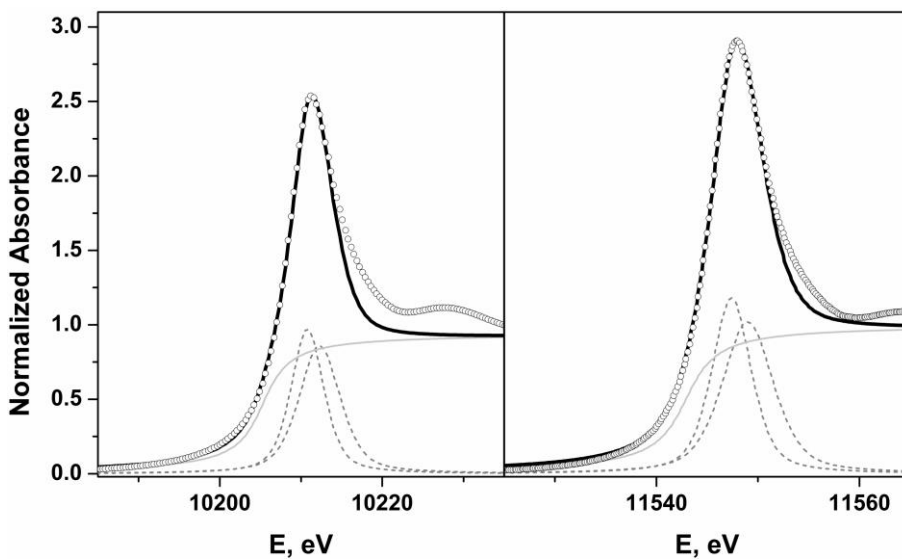

**Figure S21.** Pseudo-Voigt deconvolution of the W L<sub>3</sub>-edge (left) and L<sub>2</sub>-edge (right) spectra of [W<sup>0</sup>(Me<sub>2</sub>pipdt)(CO)<sub>4</sub>].

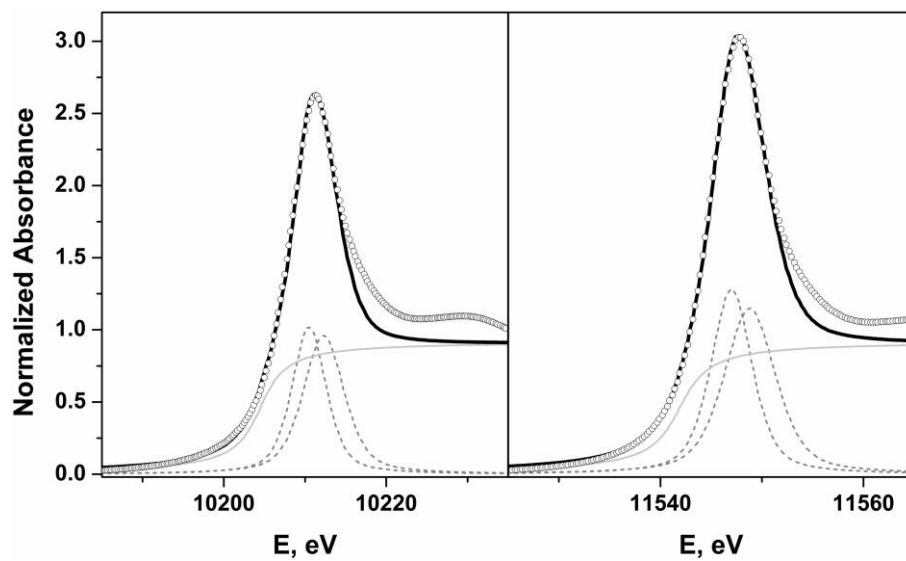

**Figure S22.** Pseudo-Voigt deconvolution of the W L<sub>3</sub>-edge (left) and L<sub>2</sub>-edge (right) spectra of  $[\text{W}^{\text{II}}(\text{mdt})(\text{CO})_4]$ .

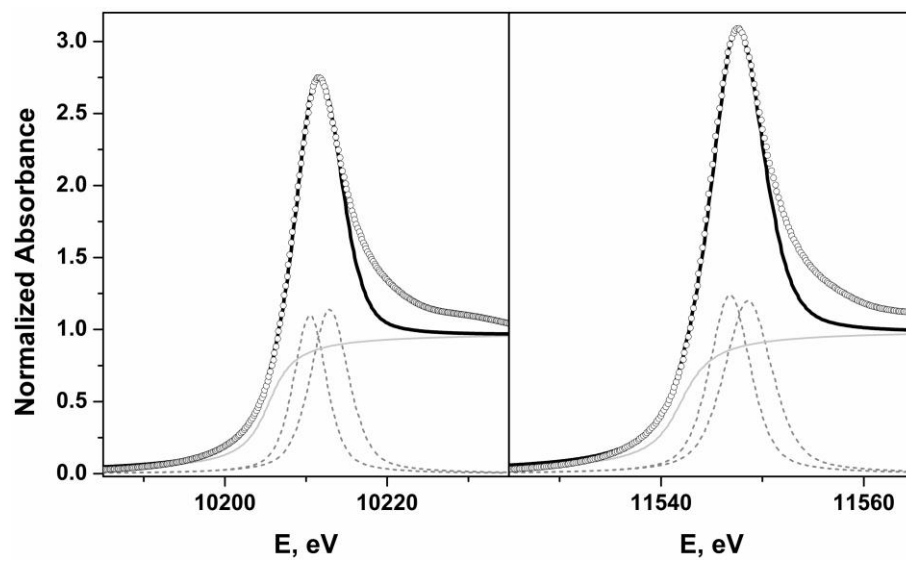

**Figure S23.** Pseudo-Voigt deconvolution of the W L<sub>3</sub>-edge (left) and L<sub>2</sub>-edge (right) spectra of  $[\text{W}^{\text{II}}(\text{mdt})(\text{CO})_2(\text{PMe}_3)_2]$ .

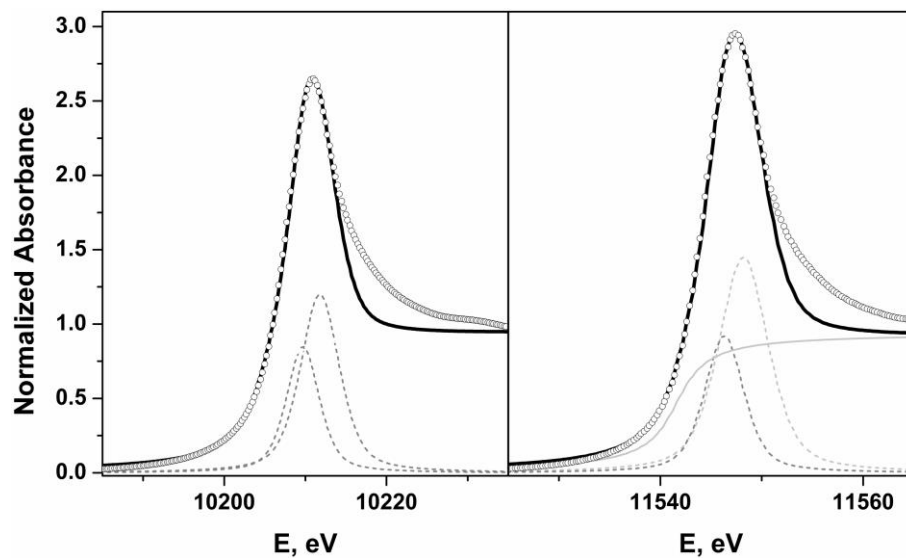

**Figure S24.** Pseudo-Voigt deconvolution of the W L<sub>3</sub>-edge (left) and L<sub>2</sub>-edge (right) spectra of [W<sup>IV</sup>(mdt)<sub>2</sub>(CO)<sub>2</sub>].

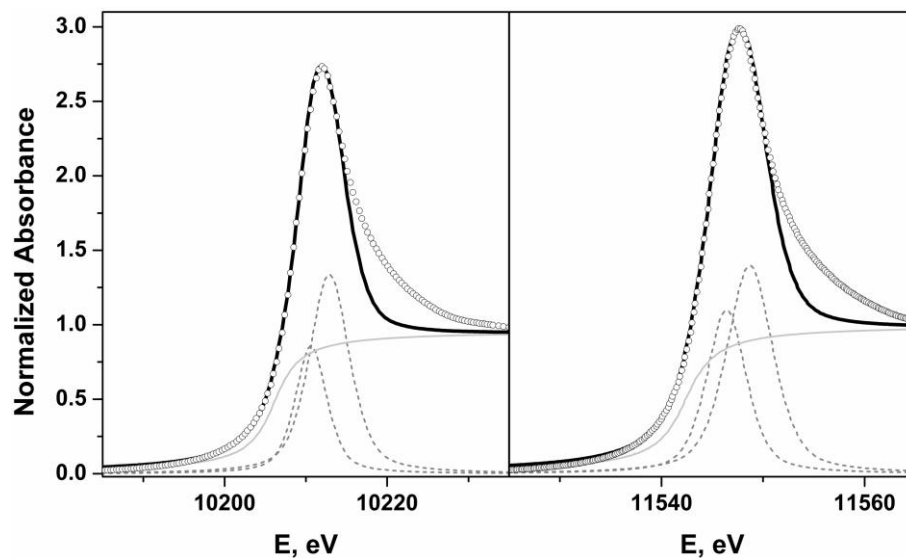

**Figure S25.** Pseudo-Voigt deconvolution of the W L<sub>3</sub>-edge (left) and L<sub>2</sub>-edge (right) spectra of [W<sup>IV</sup>(mdt)<sub>2</sub>(CO)(PMe<sub>3</sub>)].

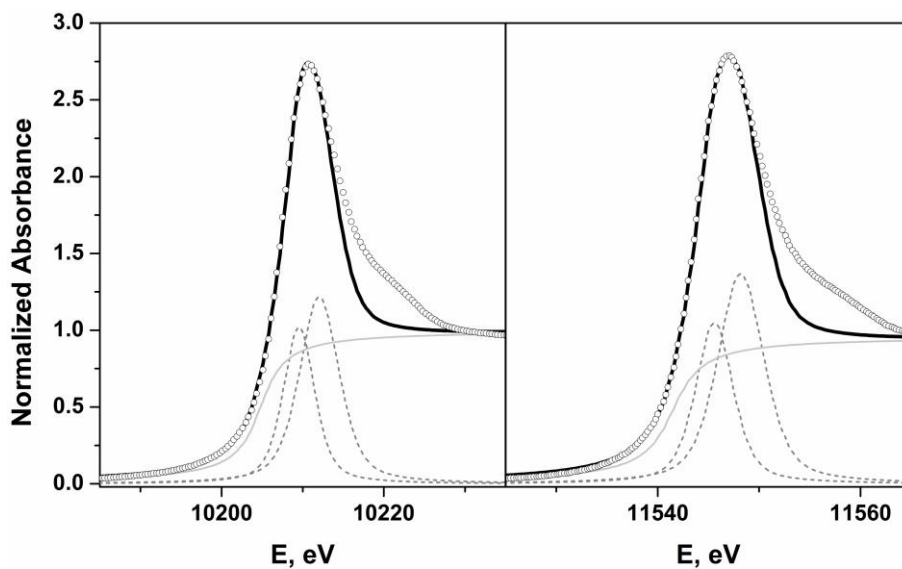

**Figure S26.** Pseudo-Voigt deconvolution of the W L<sub>3</sub>-edge (left) and L<sub>2</sub>-edge (right) spectra of [W<sup>IV</sup>(mdt)<sub>2</sub>(PMe<sub>3</sub>)<sub>2</sub>].

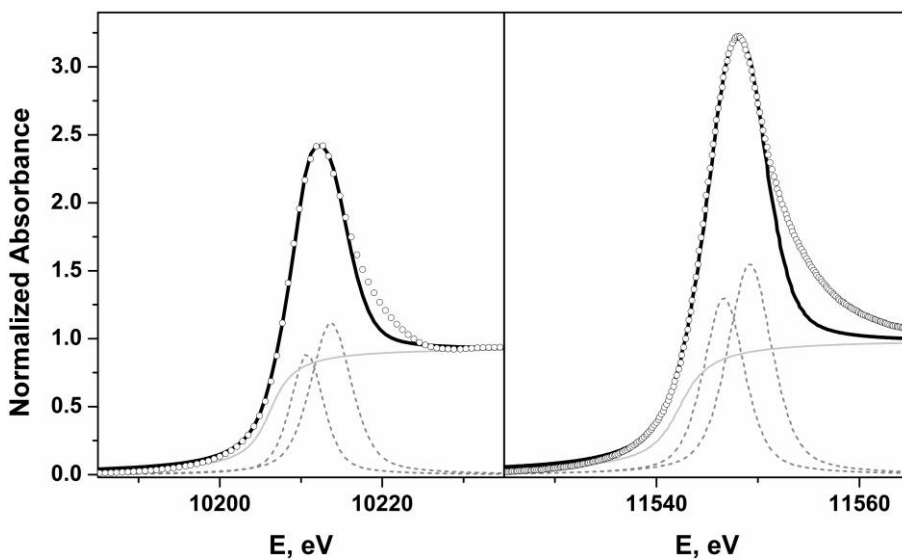

**Figure S27.** Pseudo-Voigt deconvolution of the W L<sub>3</sub>-edge (left) and L<sub>2</sub>-edge (right) spectra of [W<sup>IV</sup>(mdt)<sub>2</sub>(CN<sup>t</sup>Bu)<sub>2</sub>].

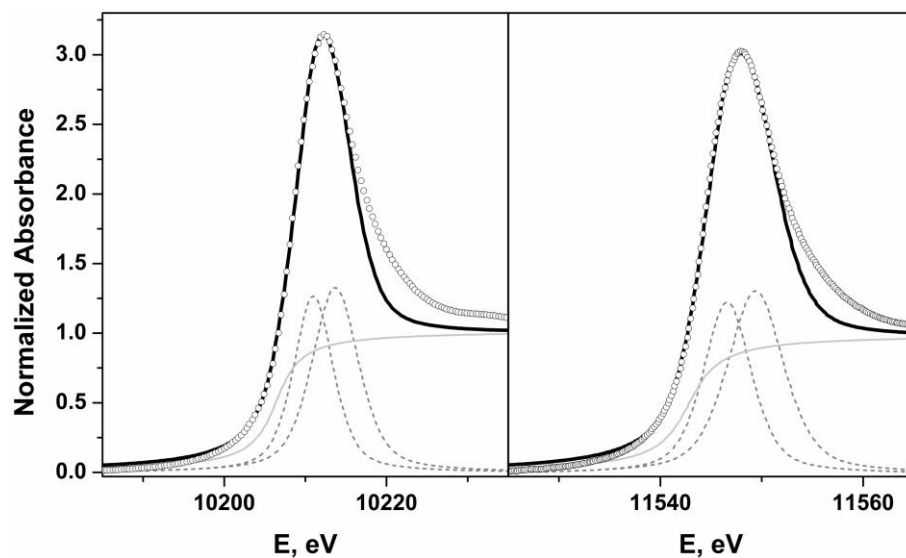

**Figure S28.** Pseudo-Voigt deconvolution of the W L<sub>3</sub>-edge (left) and L<sub>2</sub>-edge (right) spectra of [NEt<sub>4</sub>]<sub>2</sub>[W<sup>IV</sup>(mdt)<sub>2</sub>(CN)<sub>2</sub>].

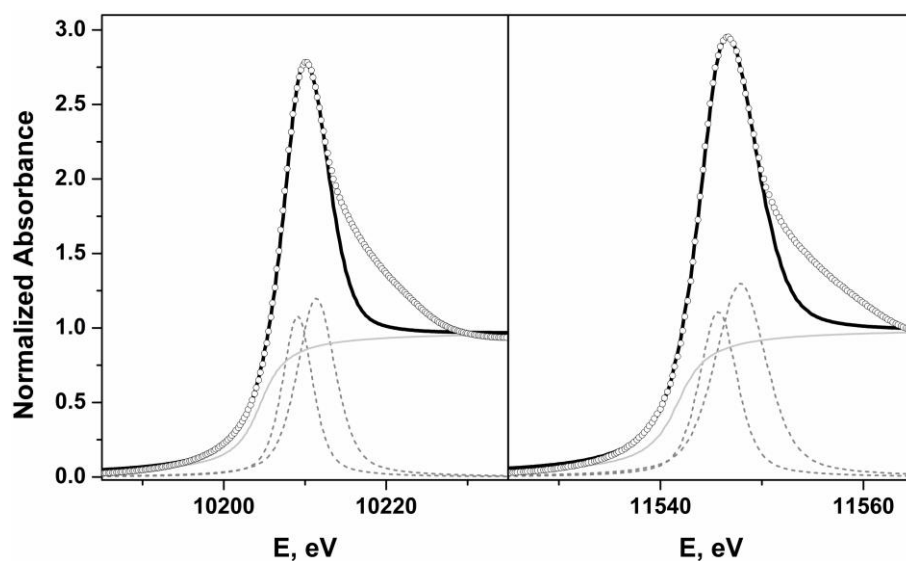

**Figure S29.** Pseudo-Voigt deconvolution of the W L<sub>3</sub>-edge (left) and L<sub>2</sub>-edge (right) spectra of [PPh<sub>4</sub>]<sub>2</sub>[W<sup>IV</sup>(mnt)<sub>3</sub>].

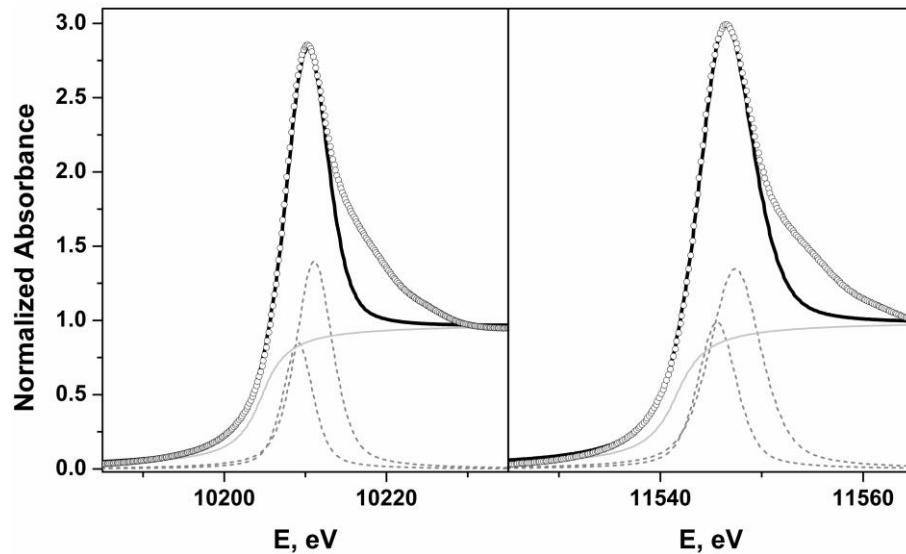

**Figure S30.** Pseudo-Voigt deconvolution of the W L<sub>3</sub>-edge (left) and L<sub>2</sub>-edge (right) spectra of [NEt<sub>4</sub>]<sub>2</sub>[W<sup>IV</sup>(bdt)<sub>3</sub>].

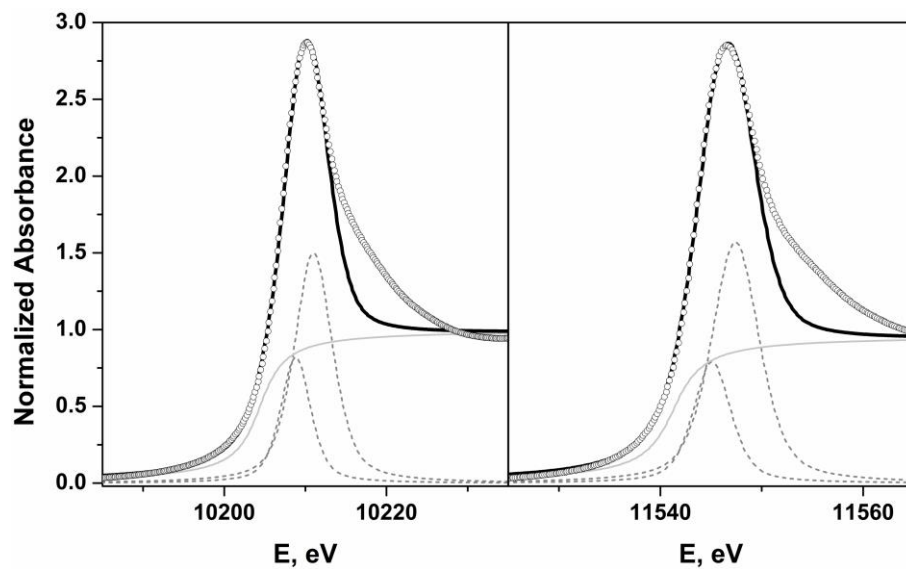

**Figure S31.** Pseudo-Voigt deconvolution of the W L<sub>3</sub>-edge (left) and L<sub>2</sub>-edge (right) spectra of [PPh<sub>4</sub>]<sub>2</sub>[W<sup>IV</sup>(bdt)<sub>3</sub>].

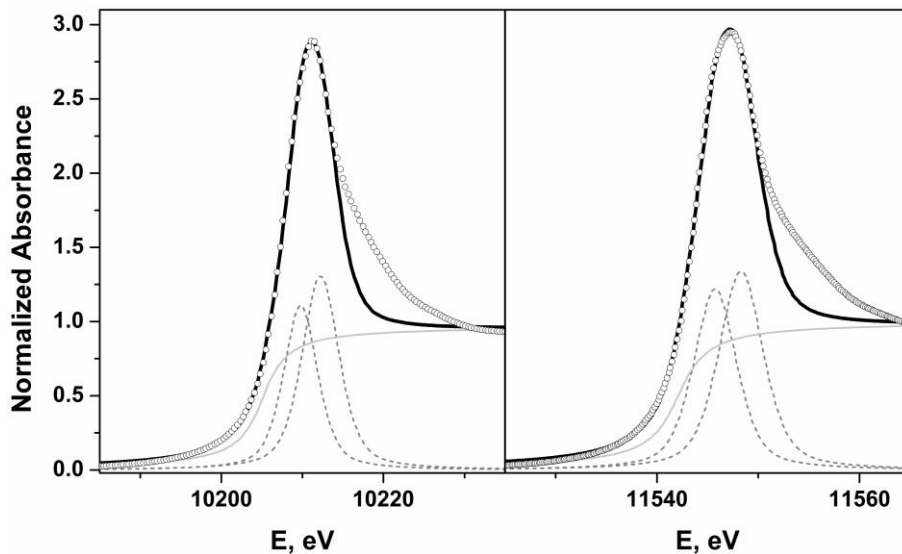

**Figure S32.** Pseudo-Voigt deconvolution of the W L<sub>3</sub>-edge (left) and L<sub>2</sub>-edge (right) spectra of [PPh<sub>4</sub>][W<sup>V</sup>(bdt)<sub>3</sub>].

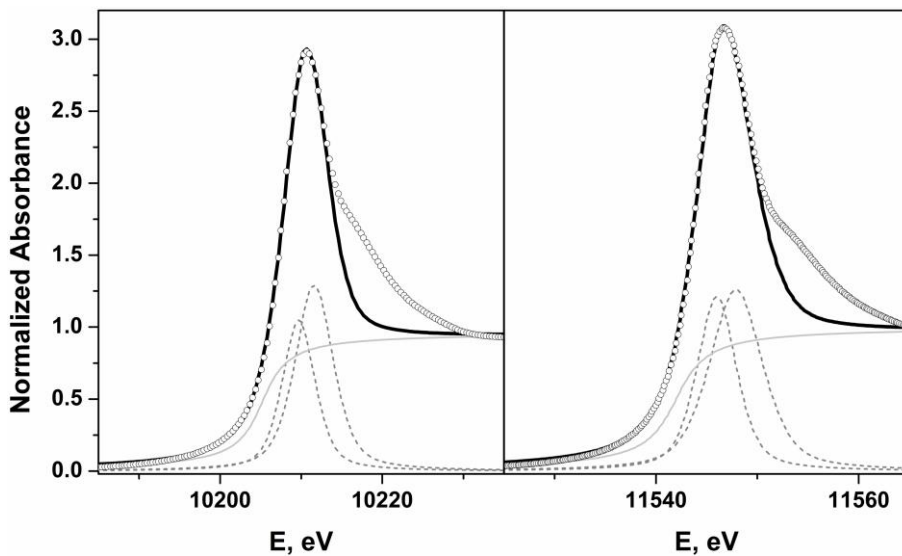

**Figure S33.** Pseudo-Voigt deconvolution of the W L<sub>3</sub>-edge (left) and L<sub>2</sub>-edge (right) spectra of [W<sup>VI</sup>(bdt)<sub>3</sub>].



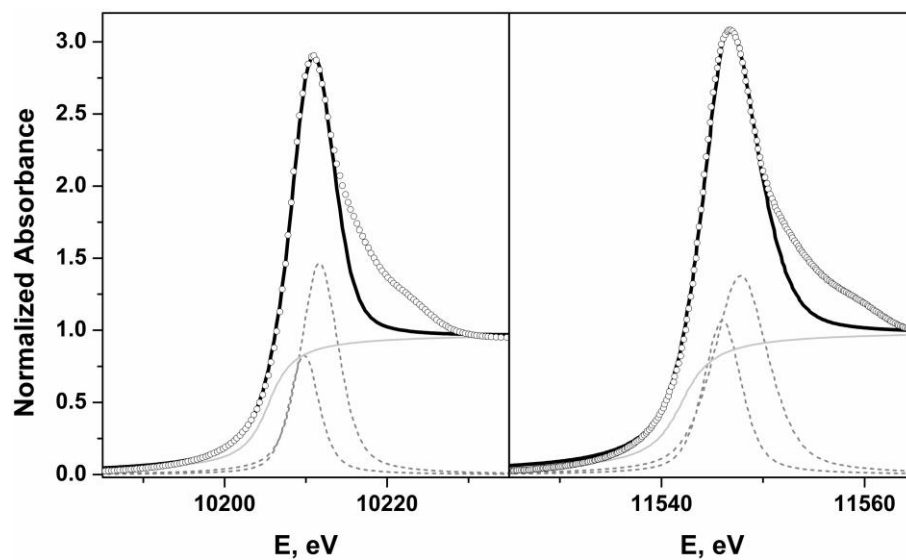

**Figure S34.** Pseudo-Voigt deconvolution of the W L<sub>3</sub>-edge (left) and L<sub>2</sub>-edge (right) spectra of [NEt<sub>4</sub>]<sub>2</sub>[W<sup>IV</sup>(mdt)<sub>3</sub>].

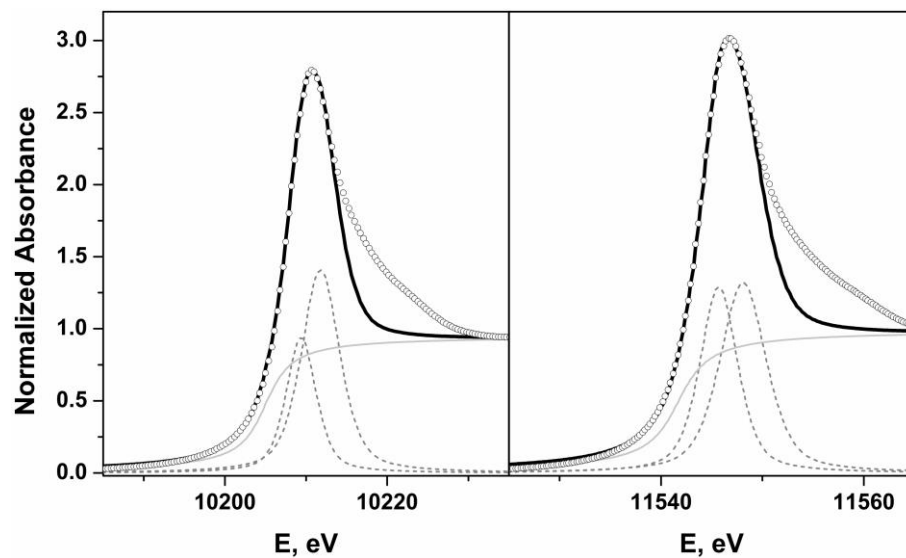

**Figure S35.** Pseudo-Voigt deconvolution of the W L<sub>3</sub>-edge (left) and L<sub>2</sub>-edge (right) spectra of [NEt<sub>4</sub>][W<sup>V</sup>(mdt)<sub>3</sub>].

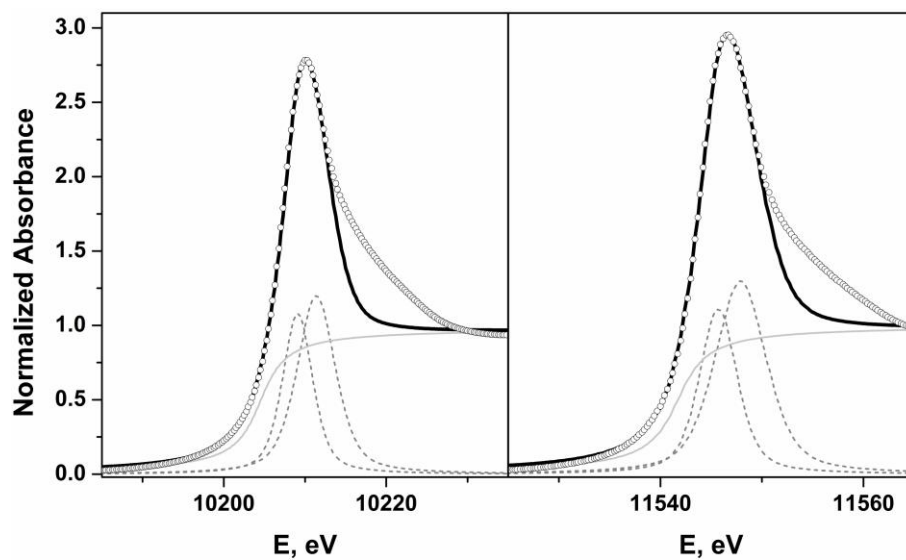

**Figure S36.** Pseudo-Voigt deconvolution of the W  $L_3$ -edge (left) and  $L_2$ -edge (right) spectra of  $[\text{W}^{\text{VI}}(\text{mdt})_3]$ .

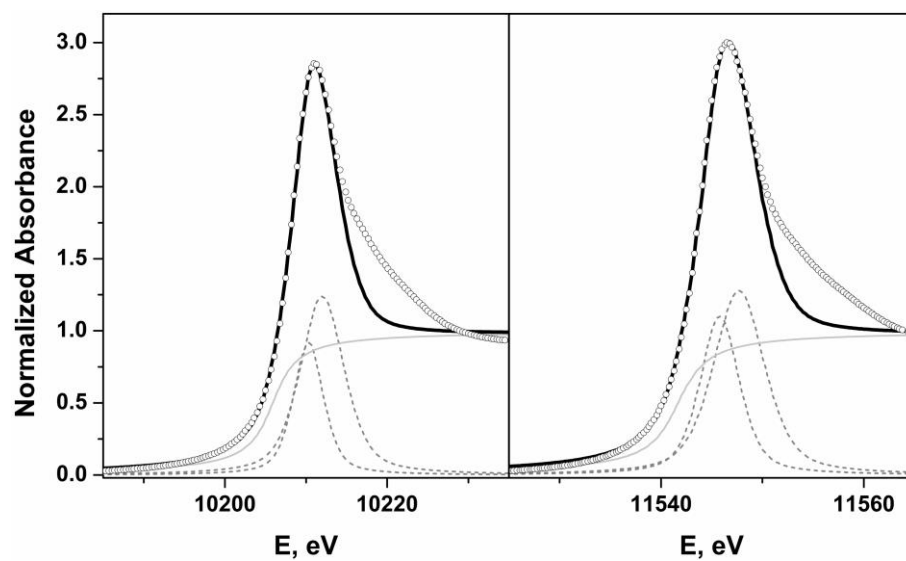

**Figure S37.** Pseudo-Voigt deconvolution of the W  $L_3$ -edge (left) and  $L_2$ -edge (right) spectra of  $[\text{W}^{\text{VI}}(\text{pdt})_3]$ .

**Table S2.** L<sub>3</sub>- and L<sub>2</sub>-edge White-Line Energies (eV) and EBR for Complexes

| Compound                                                                                 | L <sub>3</sub> | L <sub>2</sub> | EBR   |
|------------------------------------------------------------------------------------------|----------------|----------------|-------|
| [W <sup>VI</sup> (xylidene) <sub>3</sub> ]                                               | 10212.4        | 11547.6        | 0.490 |
| [W <sup>0</sup> (CO) <sub>6</sub> ]                                                      | 10211.6        | 11547.9        | 0.447 |
| [W <sup>0</sup> (Me <sub>2</sub> pipdt)(CO) <sub>4</sub> ]                               | 10211.2        | 11547.9        | 0.459 |
| [W <sup>II</sup> (mdt)(CO) <sub>4</sub> ]                                                | 10211.3        | 11547.7        | 0.454 |
| [W <sup>II</sup> (mdt)(CO) <sub>2</sub> (PMe <sub>3</sub> ) <sub>2</sub> ]               | 10211.5        | 11547.6        | 0.479 |
| [W <sup>IV</sup> (mdt) <sub>2</sub> (CO) <sub>2</sub> ]                                  | 10211.0        | 11547.4        | 0.463 |
| [W <sup>IV</sup> (mdt) <sub>2</sub> (CO)(PMe <sub>3</sub> )]                             | 10212.0        | 11547.6        | 0.482 |
| [W <sup>IV</sup> (mdt) <sub>2</sub> (PMe <sub>3</sub> ) <sub>2</sub> ]                   | 10210.7        | 11547.0        | 0.495 |
| [W <sup>IV</sup> (mdt) <sub>2</sub> (CN <sup>t</sup> Bu) <sub>2</sub> ]                  | 10212.3        | 11548.0        | 0.435 |
| [NEt <sub>4</sub> ] <sub>2</sub> [W <sup>IV</sup> (mdt) <sub>2</sub> (CN) <sub>2</sub> ] | 10212.3        | 11547.9        | 0.514 |
| [PPh <sub>4</sub> ] <sub>2</sub> [W <sup>IV</sup> (mnt) <sub>3</sub> ]                   | 10211.4        | 11547.8        | 0.504 |
| [PPh <sub>4</sub> ] <sub>2</sub> [W <sup>IV</sup> (bdt) <sub>3</sub> ]                   | 10210.2        | 11546.5        | 0.495 |
| [NEt <sub>4</sub> ] <sub>2</sub> [W <sup>IV</sup> (bdt) <sub>3</sub> ]                   | 10210.2        | 11546.5        | 0.474 |
| [NEt <sub>4</sub> ] <sub>2</sub> [W <sup>IV</sup> (mdt) <sub>3</sub> ]                   | 10210.8        | 11546.7        | 0.464 |
| [PPh <sub>4</sub> ][W <sup>V</sup> (bdt) <sub>3</sub> ]                                  | 10211.1        | 11547.1        | 0.491 |
| [NEt <sub>4</sub> ][W <sup>V</sup> (mdt) <sub>3</sub> ]                                  | 10210.7        | 11546.8        | 0.484 |
| [W <sup>VI</sup> (bdt) <sub>3</sub> ]                                                    | 10210.7        | 11546.6        | 0.478 |
| [W <sup>VI</sup> (mdt) <sub>3</sub> ]                                                    | 10210.2        | 11546.5        | 0.475 |
| [W <sup>VI</sup> (pdt) <sub>3</sub> ]                                                    | 10211.0        | 11546.6        | 0.485 |

**Table S3.** Optimized Coordinations for [W(PH<sub>3</sub>)<sub>6</sub>]

|    |           |           |           |
|----|-----------|-----------|-----------|
| 74 | -0.013831 | 0.000548  | 0.000446  |
| 15 | 1.440206  | 0.517995  | -1.838415 |
| 1  | 2.884958  | 0.436996  | -1.697048 |
| 1  | 1.415745  | -0.214967 | -3.092269 |
| 1  | 1.468824  | 1.824282  | -2.473468 |
| 15 | -1.403326 | -1.304880 | -1.440822 |
| 1  | -0.836626 | -2.245190 | -2.392585 |
| 1  | -2.386701 | -2.239047 | -0.919210 |
| 1  | -2.308300 | -0.693409 | -2.399058 |
| 15 | -1.326853 | 1.941618  | -0.469506 |
| 1  | -0.707569 | 3.224460  | -0.755231 |
| 1  | -2.242334 | 1.994660  | -1.596549 |
| 1  | -2.278503 | 2.477994  | 0.488889  |
| 15 | -1.431017 | -0.527154 | 1.850856  |
| 1  | -0.885512 | -0.935769 | 3.133811  |
| 1  | -2.353841 | 0.442872  | 2.415518  |
| 1  | -2.405416 | -1.603332 | 1.785247  |
| 15 | 1.345167  | -1.923253 | 0.464649  |
| 1  | 2.796163  | -1.831080 | 0.462199  |
| 1  | 1.286749  | -2.645483 | 1.723705  |
| 1  | 1.313451  | -3.122920 | -0.353967 |
| 15 | 1.415285  | 1.294067  | 1.432014  |
| 1  | 2.861831  | 1.165959  | 1.360315  |
| 1  | 1.436208  | 2.746629  | 1.414209  |
| 1  | 1.372463  | 1.200861  | 2.880885  |

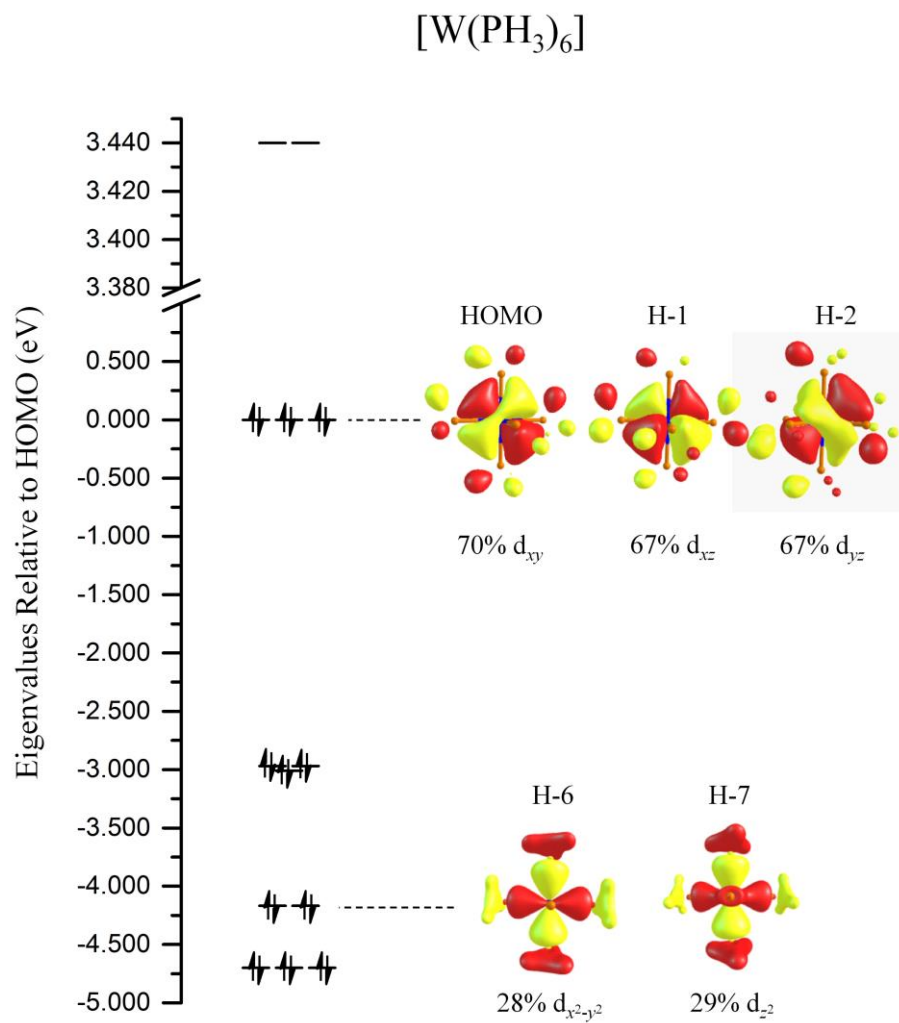

**Figure S38.** MO energy level diagram for  $[\text{W}(\text{PH}_3)_6]$ . Contour levels for the orbital images are drawn at the 0.05 level.

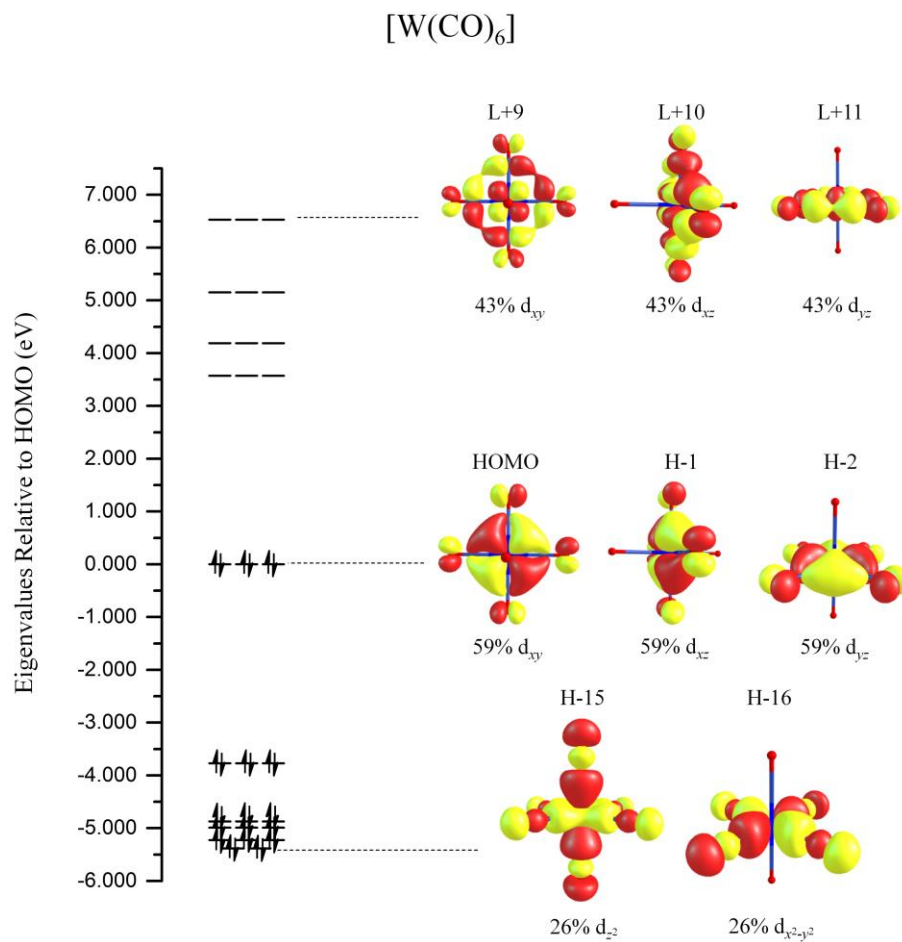

**Figure S39.** MO energy level diagram for [W(CO)<sub>6</sub>]. Contour levels for the orbital images are drawn at the 0.05 level.

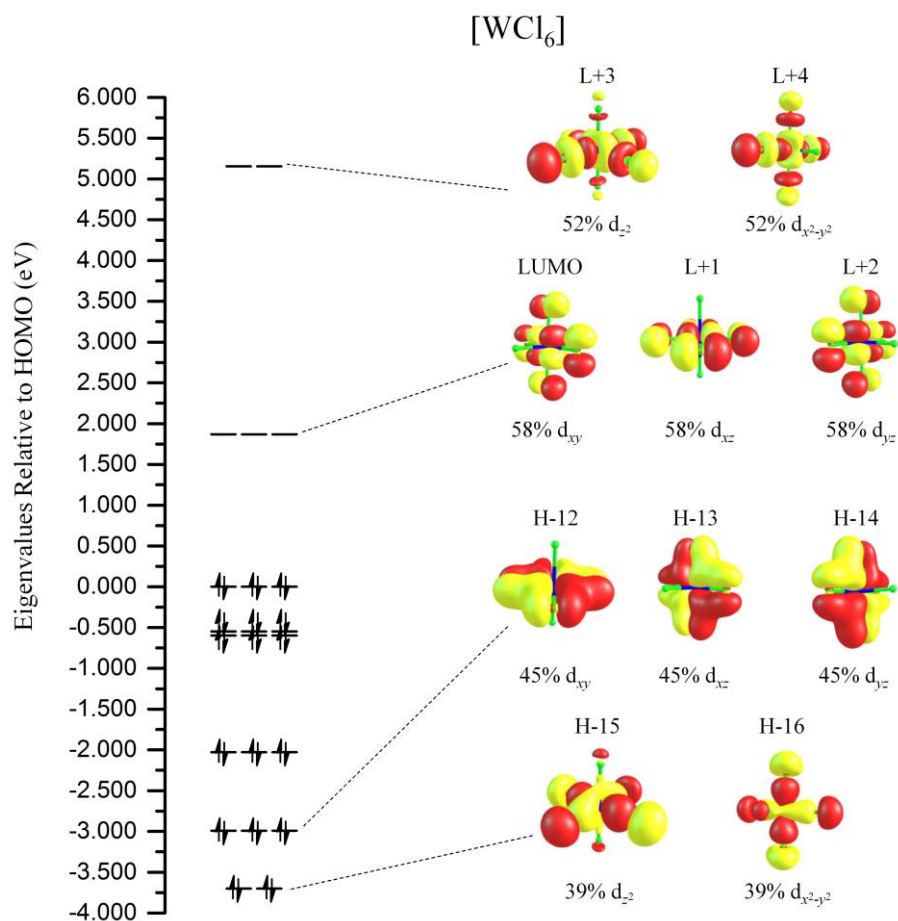

**Figure S40.** MO energy level diagram for [WCl<sub>6</sub>]. Contour levels for the orbital images are drawn at the 0.05 level.

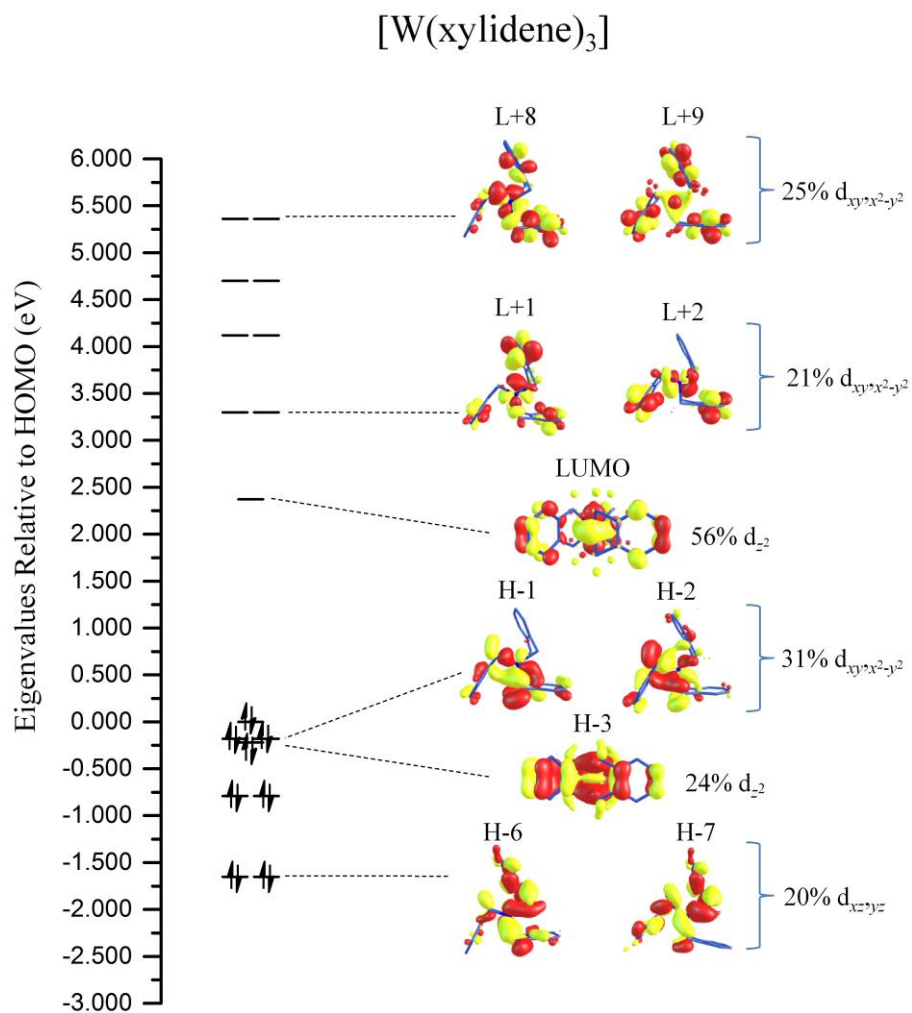

**Figure S41.** MO energy level diagram for [W(xylidene)<sub>3</sub>]. Contour levels for the orbital images are drawn at the 0.05 level.



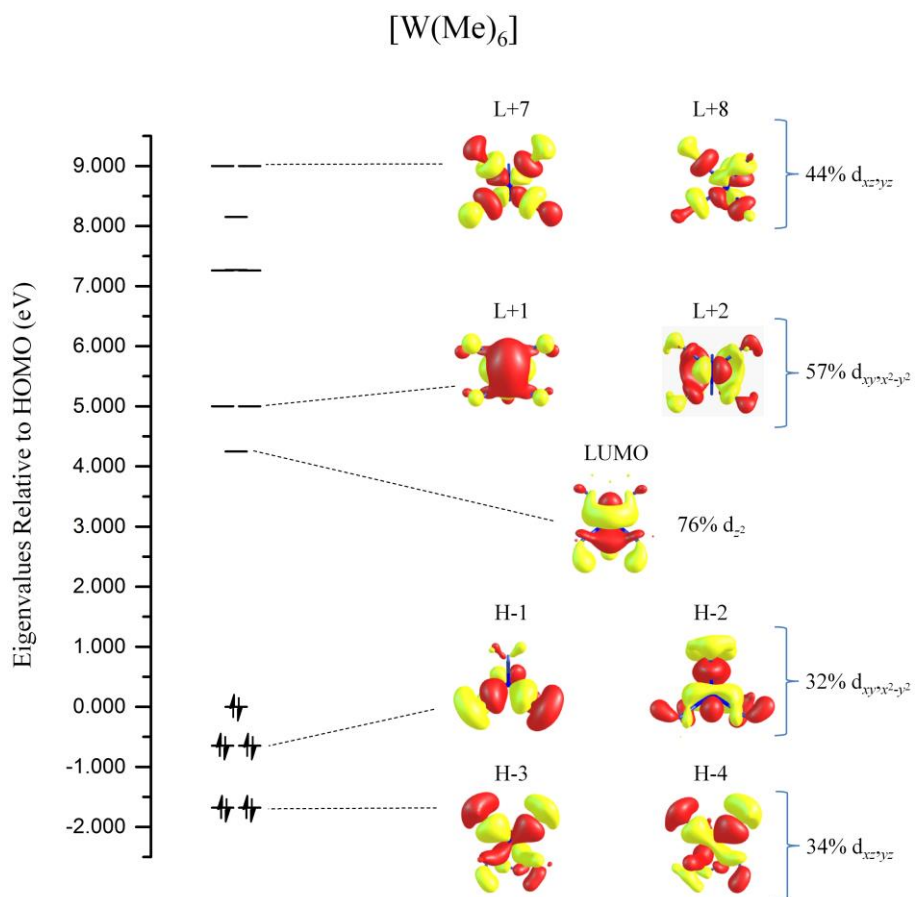

**Figure S42.** MO energy level diagram for [W(Me)<sub>6</sub>]. Contour levels for the orbital images are drawn at the 0.05 level.

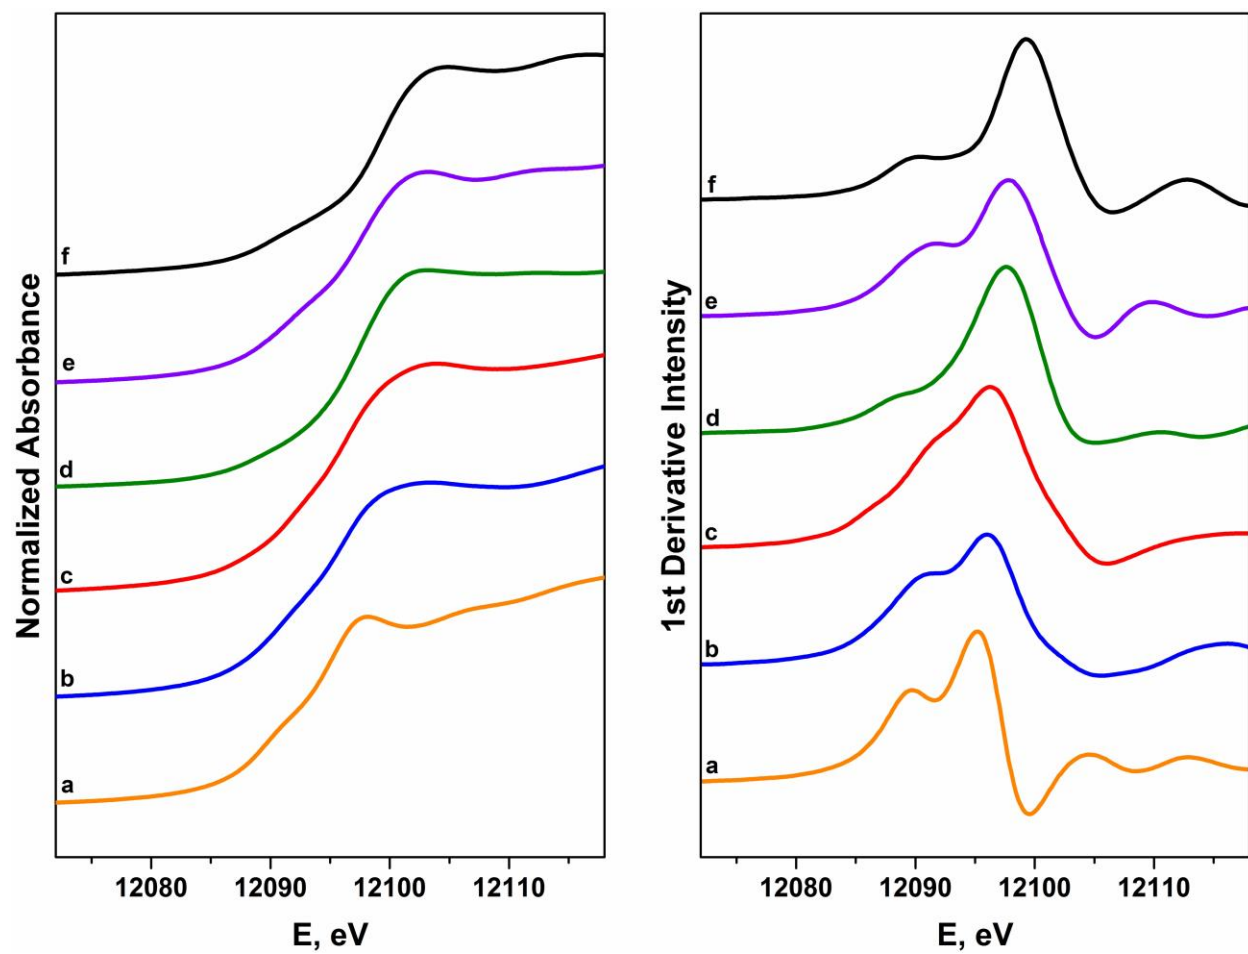

**Figure S43.** Comparison of the  $L_1$ -edge (panel A) and FFT smoothed first derivative (panel B) X-ray absorption spectra of (a)  $[\text{W}^0(\text{PMe}_3)_6]$ , (b)  $[\text{W}^{\text{II}}\text{Cl}_2(\text{PMePh}_2)_4]$ , (c)  $[\text{W}^{\text{III}}\text{Cl}_2(\text{dppe})_2][\text{PF}_6]$ , (d)  $[\text{W}^{\text{IV}}\text{Cl}_4(\text{PMePh}_2)_2]$ , (e)  $[\text{W}^{\text{V}}(\text{NPh})\text{Cl}_3(\text{PMe}_3)_2]$ , (f)  $[\text{W}^{\text{VI}}\text{Cl}_6]$ .

**Table S4.** W L<sub>1</sub>-Pre- and Rising-Edge Energies (eV), W 6p% in LUMO and LUMO+1, and Trigonal Twist Angle,  $\Theta$  (°)

|                                                         | <b>Pre-Edge</b> | <b>Rising-Edge</b> | <b>W 6p</b> | <b><math>\Theta</math></b> |
|---------------------------------------------------------|-----------------|--------------------|-------------|----------------------------|
| [NEt <sub>4</sub> ] <sub>2</sub> [W(mdt) <sub>3</sub> ] | 12089.8         | 12096.6            | 3.5         | 2.4                        |
| [NEt <sub>4</sub> ][W(mdt) <sub>3</sub> ]               | 12089.8         | 12096.4            | 3.6         | 2.9                        |
| [W(mdt) <sub>3</sub> ]                                  | 12090.2         | 12096.5            | 4.5         | 0.7                        |
| [NEt <sub>4</sub> ] <sub>2</sub> [W(bdt) <sub>3</sub> ] | 12091.0         | 12096.3            | 3.4         | 1.9                        |
| [PPh <sub>4</sub> ] <sub>2</sub> [W(bdt) <sub>3</sub> ] | 12090.1         | 12096.2            | 1.9         | 23.0                       |
| [PPh <sub>4</sub> ][W(bdt) <sub>3</sub> ]               | 12090.0         | 12096.2            | 1.3         | 32.3                       |
| [W(bdt) <sub>3</sub> ]                                  | 12090.4         | 12096.2            | 3.9         | 0                          |

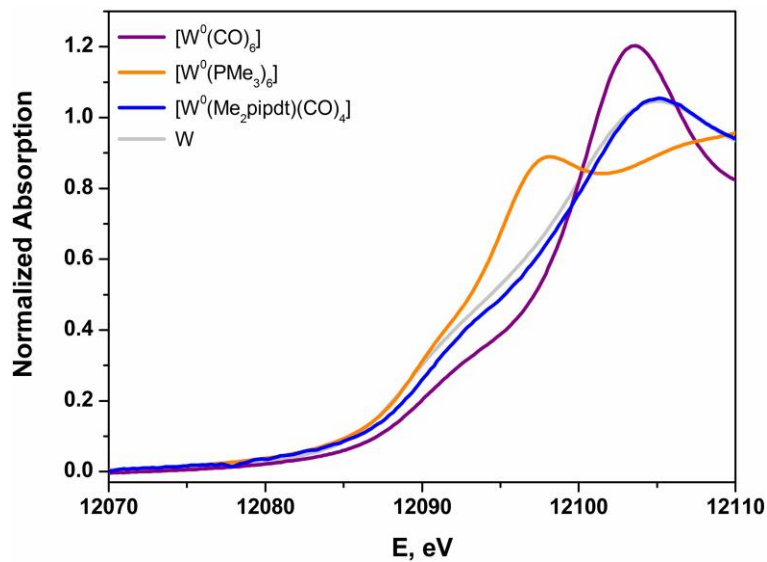

**Figure S44.** Overlay of the normalized W  $L_1$ -edge X-ray absorption spectra of  $[W^0(CO)_6]$ ,  $[W^0(PMe_3)_6]$ ,  $[W^0(Me_2pipdt)(CO)_4]$ , and W foil.

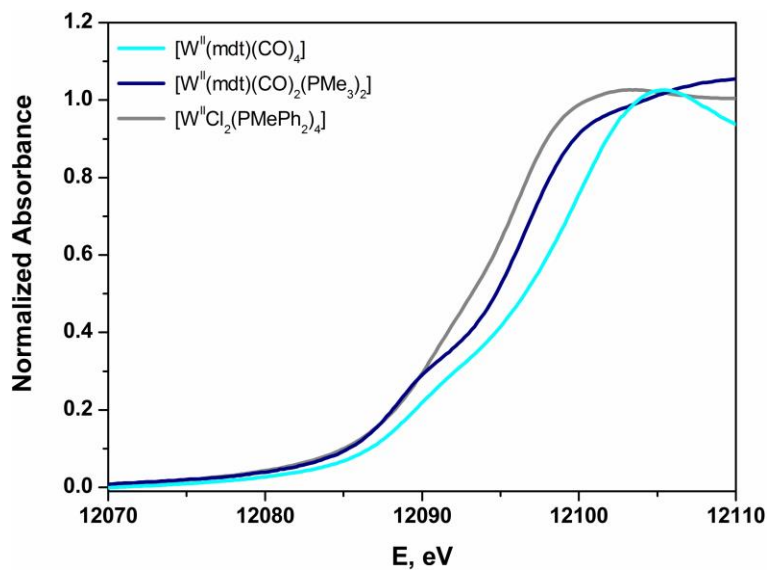

**Figure S45.** Overlay of the normalized W L<sub>1</sub>-edge X-ray absorption spectra of formally W<sup>II</sup> compounds [W<sup>II</sup>(mdt)(CO)<sub>4</sub>], [W<sup>II</sup>(mdt)(CO)<sub>2</sub>(PMe<sub>3</sub>)<sub>2</sub>], and [W<sup>II</sup>Cl<sub>2</sub>(PMePh<sub>2</sub>)<sub>4</sub>].

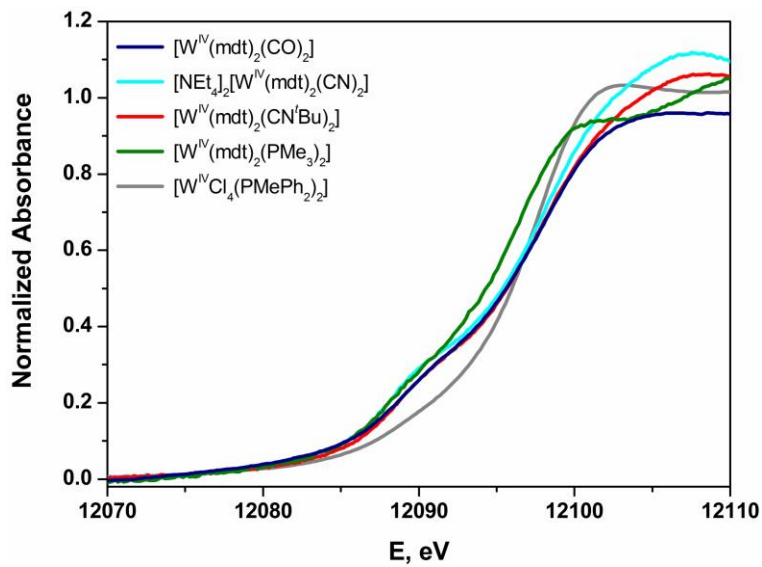

**Figure S46.** Overlay of the normalized W L<sub>1</sub>-edge X-ray absorption spectra of formally W<sup>IV</sup> compounds  $[\text{W}^{\text{IV}}(\text{mdt})_2(\text{CO})_2]$ ,  $[\text{W}^{\text{IV}}(\text{mdt})_2(\text{CO})(\text{PMe}_3)]$ ,  $[\text{W}^{\text{IV}}(\text{mdt})_2(\text{PMe}_3)_2]$ ,  $[\text{W}^{\text{IV}}(\text{mdt})_2(\text{CN}^t\text{Bu})_2]$ ,  $[\text{NEt}_4]_2[\text{W}^{\text{IV}}(\text{mdt})_2(\text{CN})_2]$ , and  $[\text{W}^{\text{IV}}\text{Cl}_4(\text{PMePh}_2)_2]$ .

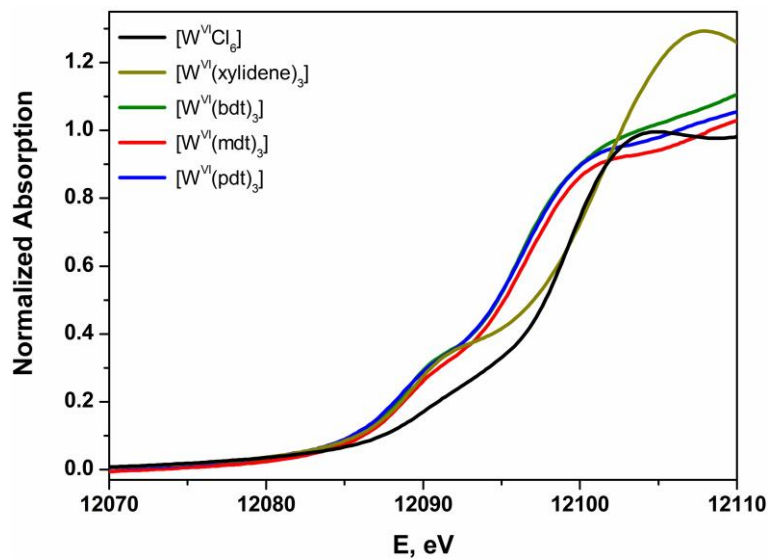

**Figure S47.** Overlay of the normalized W L<sub>1</sub>-edge X-ray absorption spectra of formally W<sup>VI</sup> compounds [W<sup>VI</sup>Cl<sub>6</sub>], [W<sup>VI</sup>(xylidene)<sub>3</sub>], [W<sup>VI</sup>(bdt)<sub>3</sub>], [W<sup>VI</sup>(mdt)<sub>3</sub>], and [W<sup>VI</sup>(pdt)<sub>3</sub>].

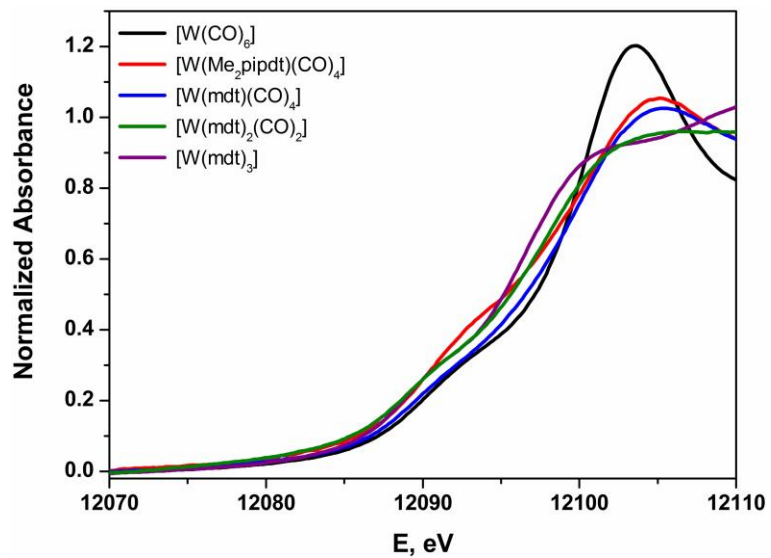

**Figure S48.** Overlay of the normalized W  $L_1$ -edge X-ray absorption spectra of  $[W^0(CO)_6]$ ,  $[W^0(Me_2pipdt)(CO)_4]$ ,  $[W^{II}(mdt)(CO)_4]$ ,  $[W^{IV}(mdt)_2(CO)_2]$ , and  $[W^{VI}(mdt)_3]$ .



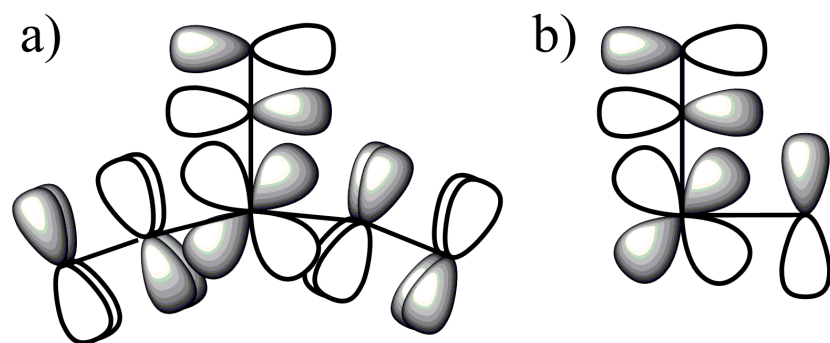

**Figure S49.** (a) Illustration of the HOMO-2 in  $[\text{W}(\text{mdt})_2(\text{CO})_2]$ , which is dithiolene-to-CO  $\pi^*$  donating, via tungsten. (b) Illustration of the “synergistic”  $\pi$ -donating oxo and  $\pi$ -accepting carbonyl in *cis*- $\text{W}^{\text{IV}}\text{O}(\text{CO})$  complexes, which is analogous to the MO shown in (a).

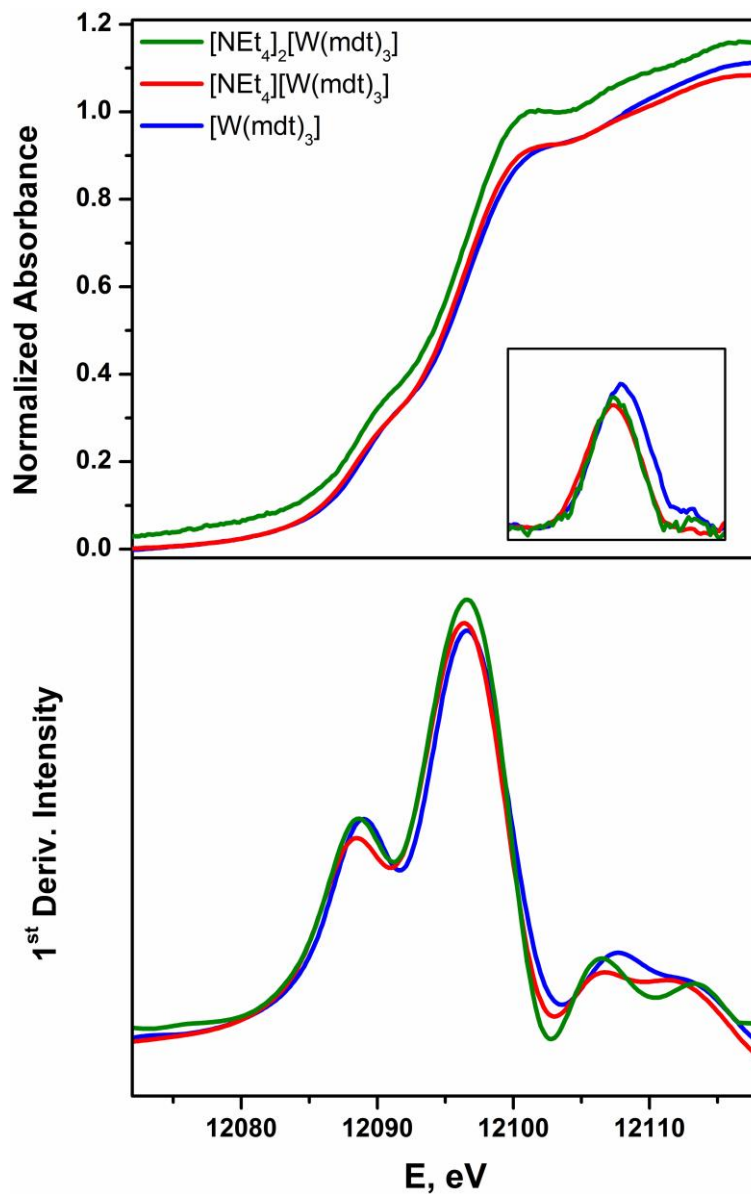

**Figure S50.** Overlay of the normalized W  $L_1$ -edge X-ray absorption (top) and first derivative spectra (bottom) of the series  $[\text{W}(\text{mdt})_3]^{0,1-,2-}$ . Inset shows the relative intensity of the pre-edge peak at  $\sim 12090$  eV.

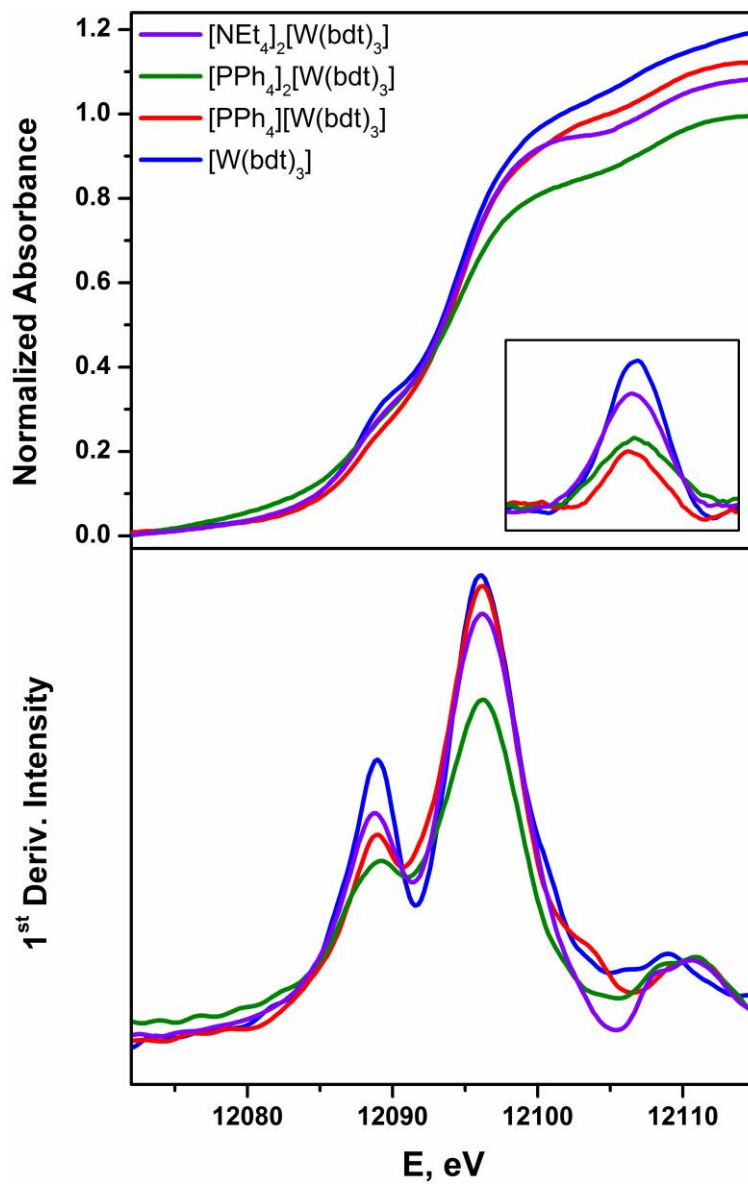

**Figure S51.** Overlay of the normalized W L<sub>1</sub>-edge X-ray absorption (top) and first derivative spectra (bottom) of the series  $[\text{W}(\text{bdt})_3]^{0,1-,2-}$ . Inset shows the relative intensity of the pre-edge peak at ~12090 eV.

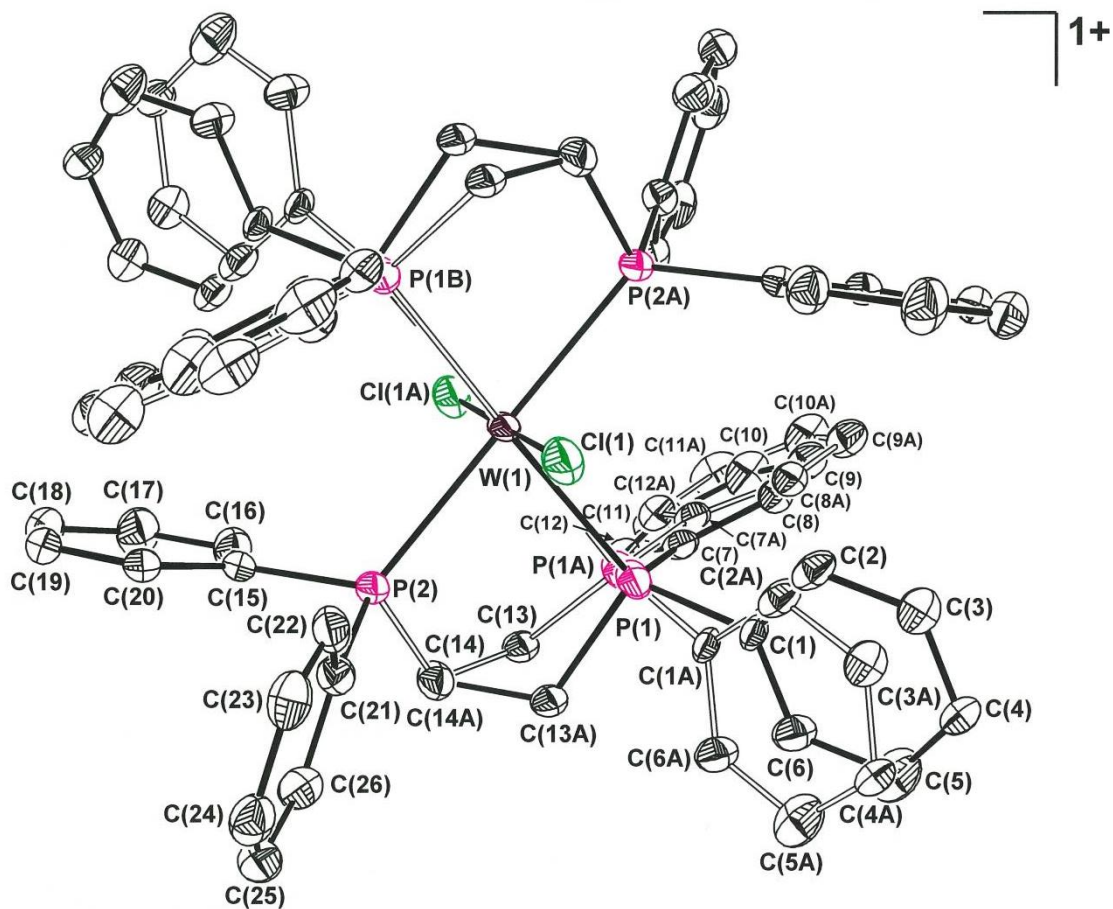

**Figure S52.** Thermal ellipsoid plot of cation 1 of  $[\text{W}^{\text{III}}\text{Cl}_2(\text{dppe})_2]^{1+}$  with complete atom labeling. The tungsten atom resides on an inversion center, which requires that only half of the cation be crystallographically unique. The ellipsoids are shown at the 50% probability level. Hydrogen atoms are omitted for clarity.

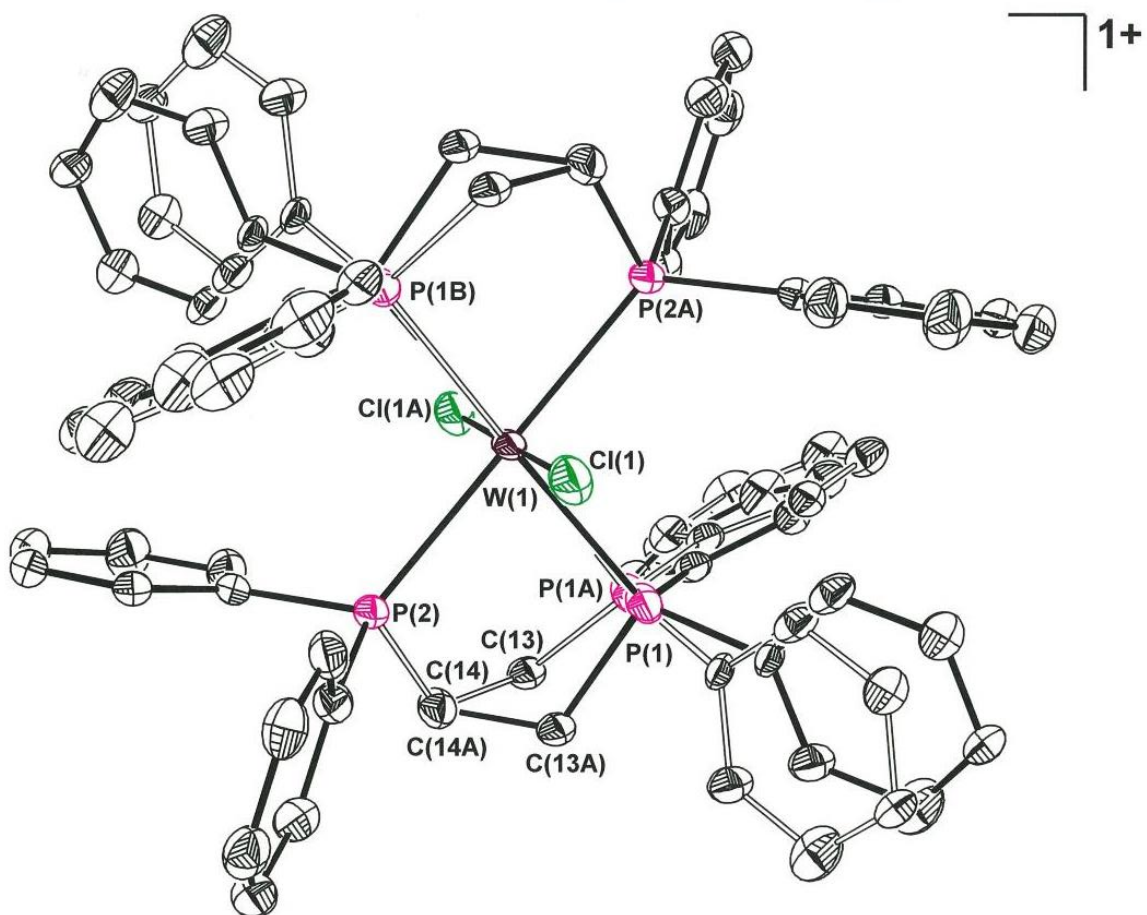

**Figure S53.** Thermal ellipsoid plot of cation 1 of  $[\text{W}^{\text{III}}\text{Cl}_2(\text{dppe})_2]^{1+}$  with partial atom labeling. The tungsten atom resides on an inversion center, which requires that only half of the cation be crystallographically unique. The ellipsoids are shown at the 50% probability level. Hydrogen atoms are omitted for clarity.

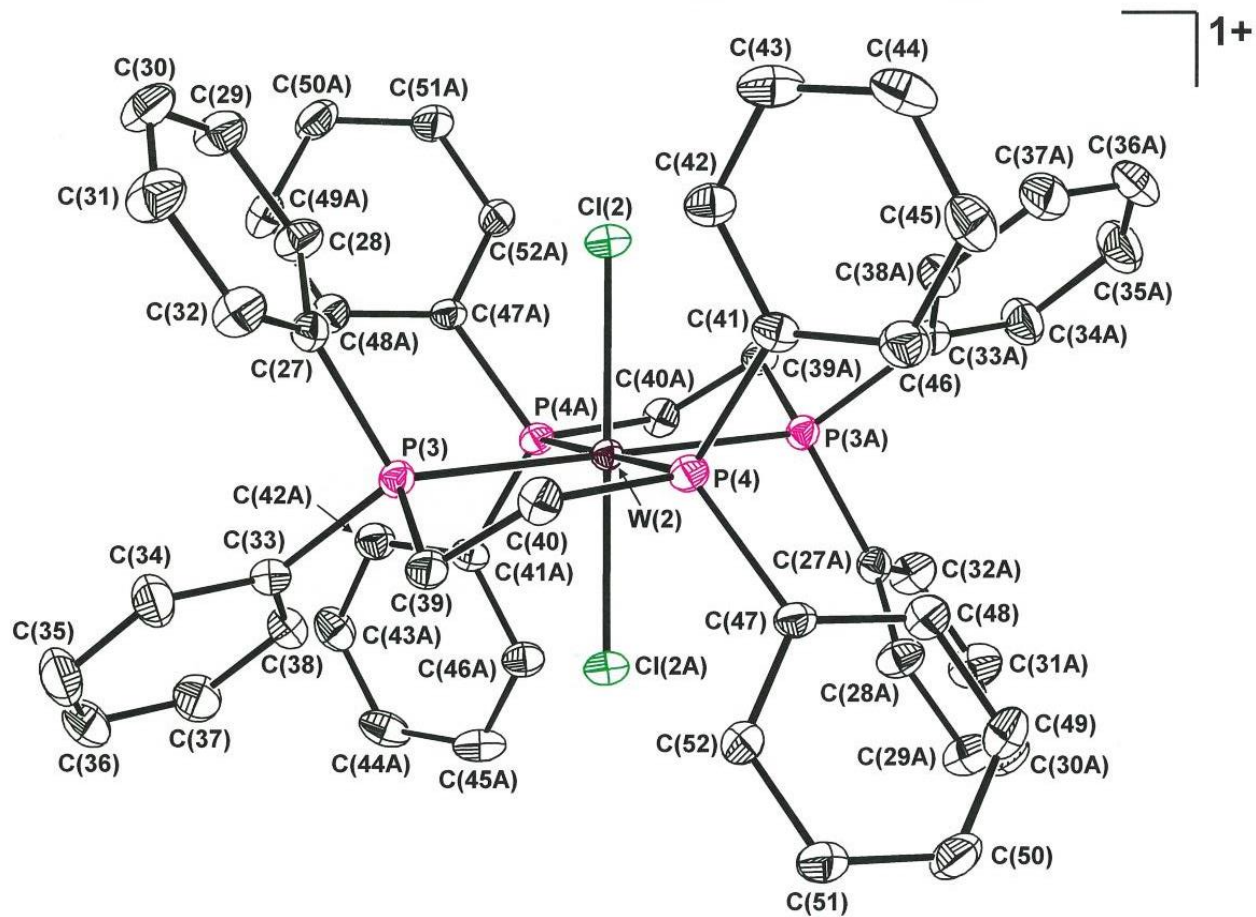

**Figure S54.** Thermal ellipsoid plot of cation 2 of  $[\text{W}^{\text{III}}\text{Cl}_2(\text{dppe})_2]^{1+}$  with complete atom labeling. The tungsten atom resides on an inversion center, which requires that only half of the cation be crystallographically unique. The ellipsoids are shown at the 50% probability level. Hydrogen atoms are omitted for clarity.

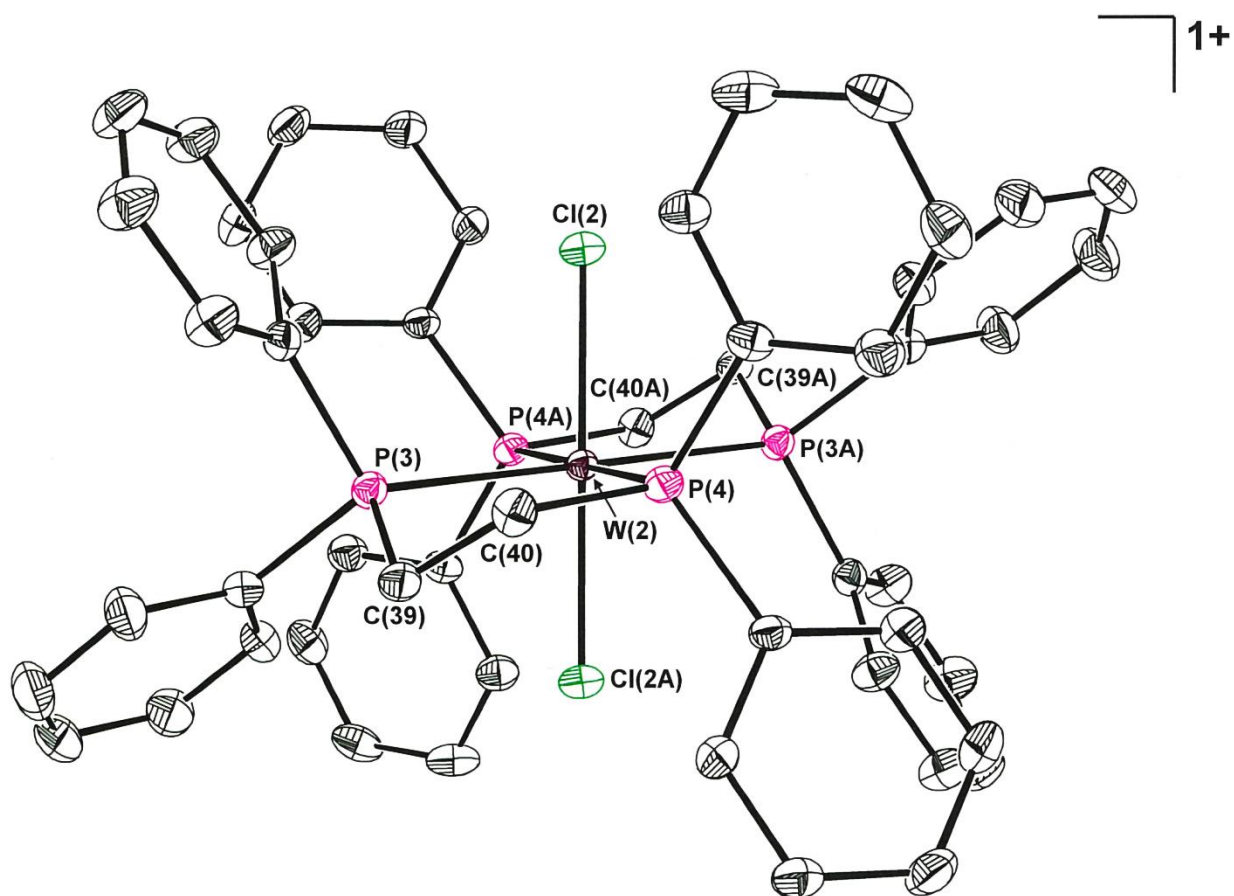

**Figure S55.** Thermal ellipsoid plot of cation 2 of  $[\text{W}^{\text{III}}\text{Cl}_2(\text{dppe})_2]^{1+}$  with partial atom labeling. The tungsten atom resides on an inversion center, which requires that only half of the cation be crystallographically unique. The ellipsoids are shown at the 50% probability level. Hydrogen atoms are omitted for clarity.



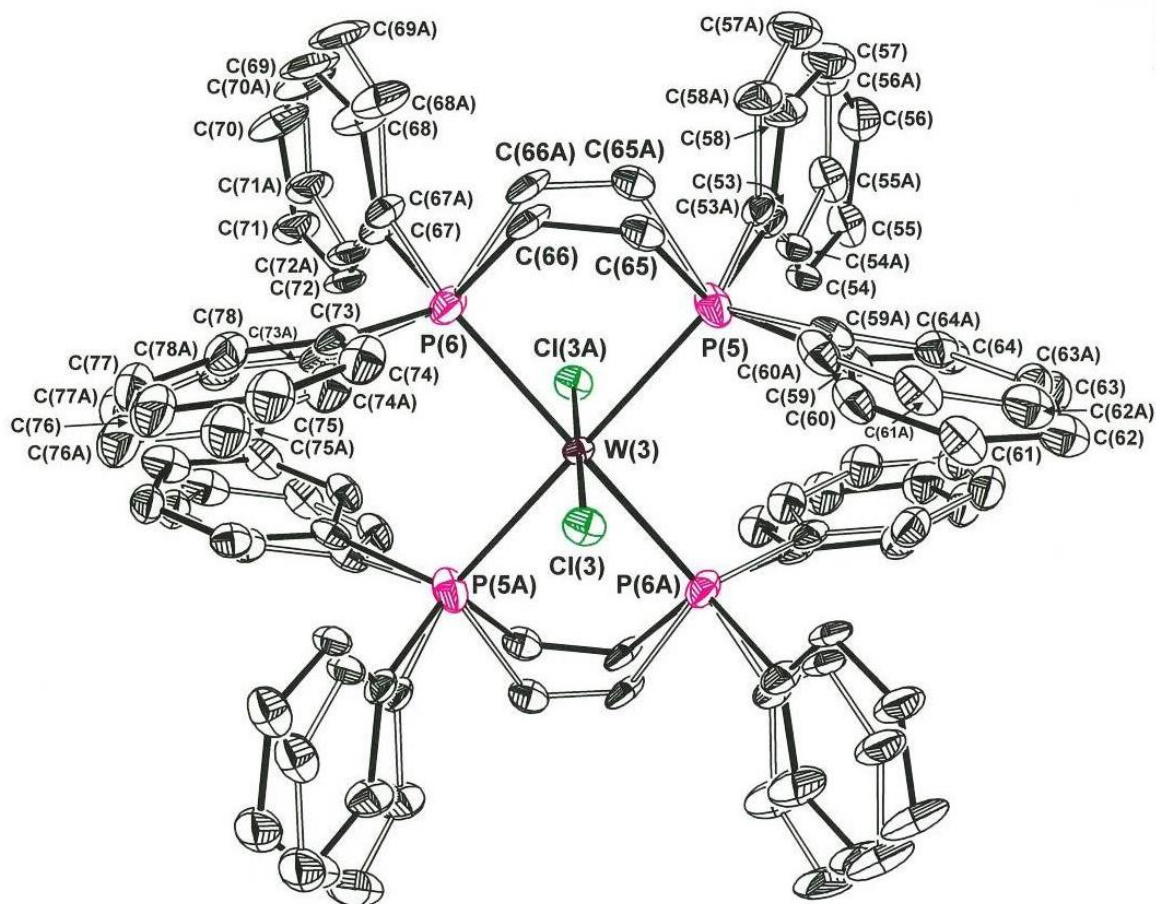

**Figure S56.** Thermal ellipsoid plot of cation 3 of  $[\text{W}^{\text{III}}\text{Cl}_2(\text{dppe})_2]^{1+}$  with complete atom labeling. The tungsten atom resides on an inversion center, which requires that only half of the cation be crystallographically unique. The ellipsoids are shown at the 50% probability level. Hydrogen atoms are omitted for clarity.



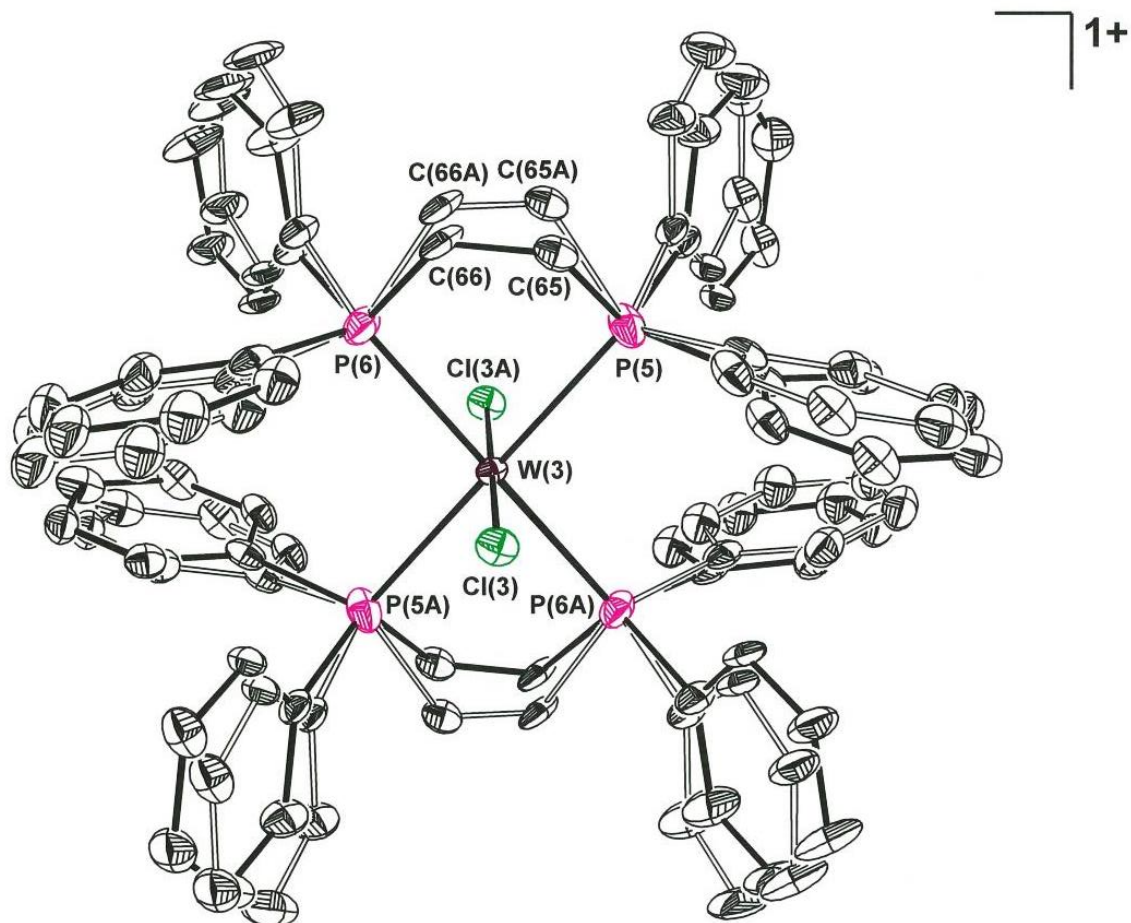

**Figure S57.** Thermal ellipsoid plot of cation 3 of  $[\text{W}^{\text{III}}\text{Cl}_2(\text{dppe})_2]^{1+}$  with partial atom labeling. The tungsten atom resides on an inversion center, which requires that only half of the cation be crystallographically unique. The ellipsoids are shown at the 50% probability level. Hydrogen atoms are omitted for clarity.

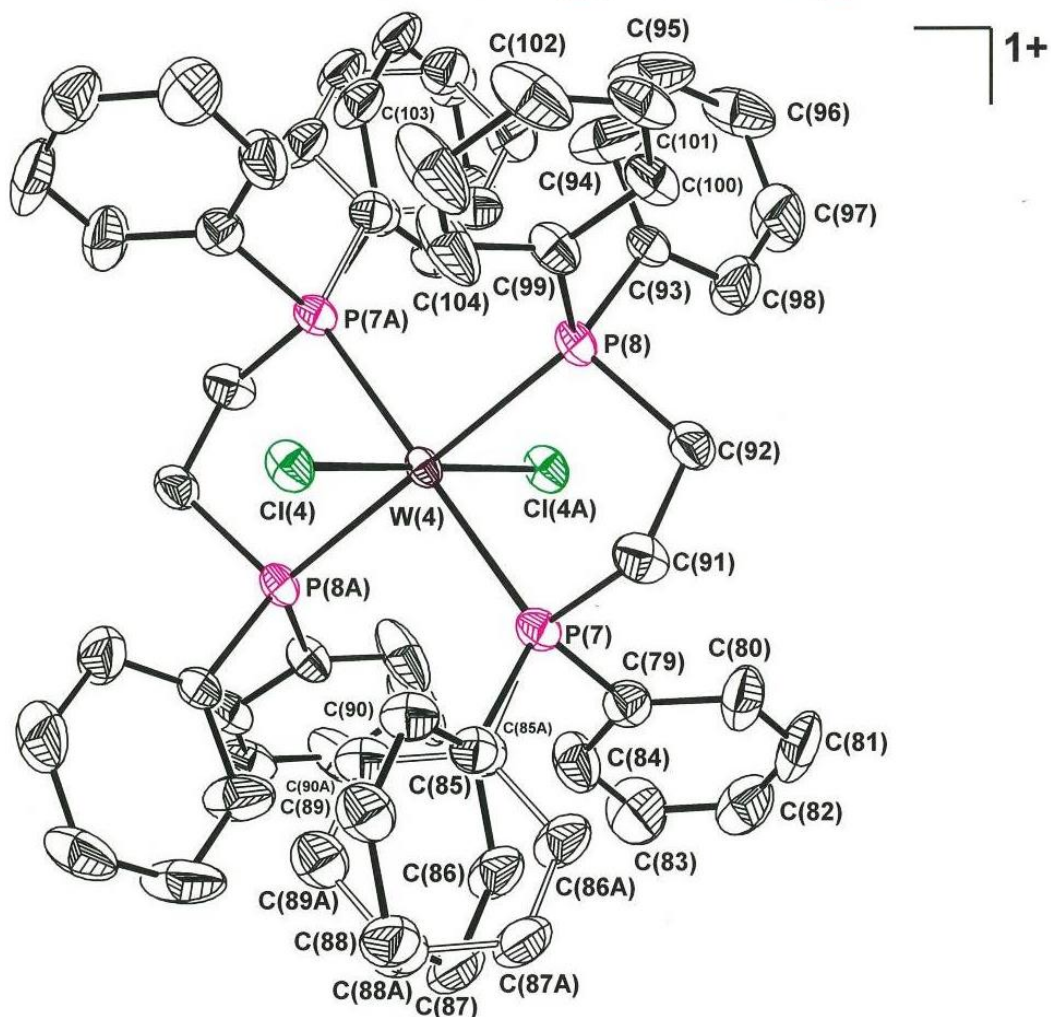

**Figure S58.** Thermal ellipsoid plot of cation 4 of  $[W^{III}Cl_2(dppe)_2]^{1+}$  with complete atom labeling. The tungsten atom resides on an inversion center, which requires that only half of the cation be crystallographically unique. The ellipsoids are shown at the 50% probability level. Hydrogen atoms are omitted for clarity.

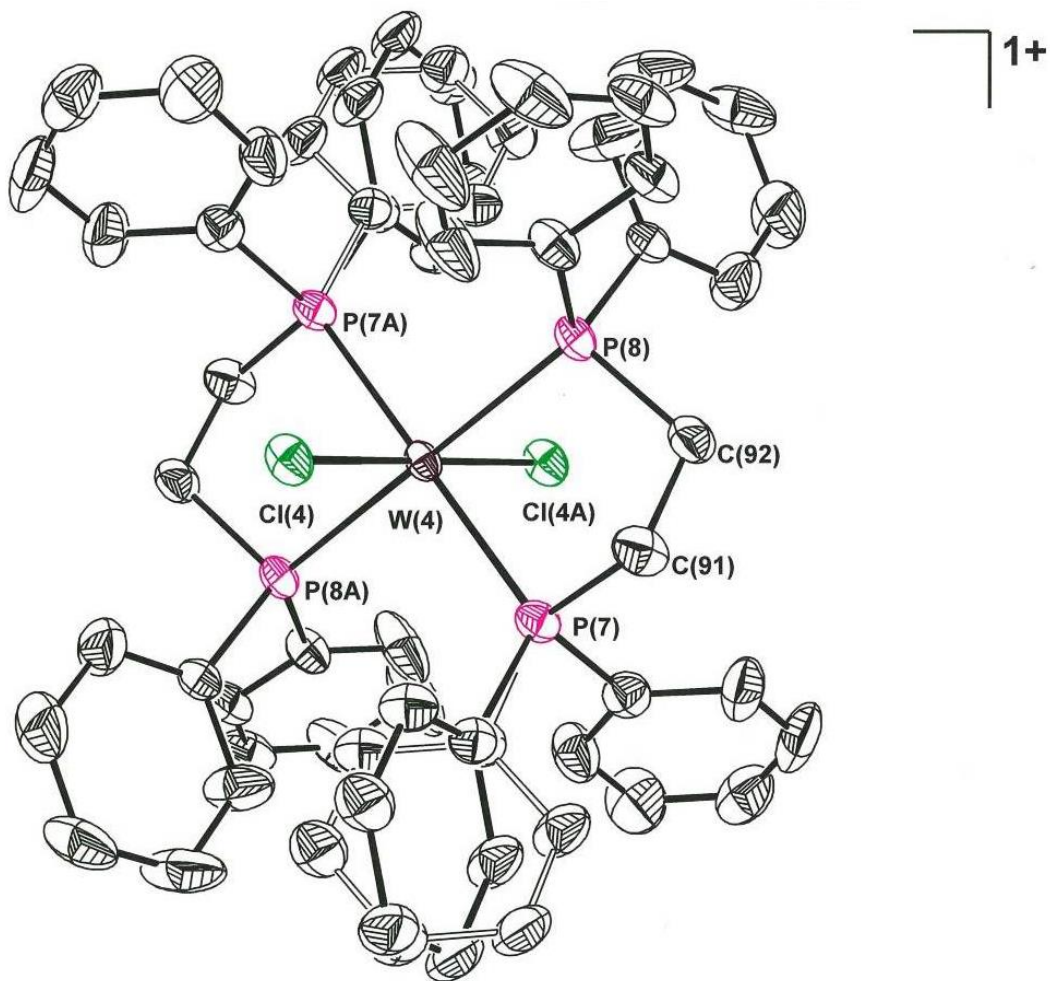

**Figure S59.** Thermal ellipsoid plot of cation 4 of  $[\text{W}^{\text{III}}\text{Cl}_2(\text{dppe})_2]^{1+}$  with partial atom labeling. The tungsten atom resides on an inversion center, which requires that only half of the cation be crystallographically unique. The ellipsoids are shown at the 50% probability level. Hydrogen atoms are omitted for clarity.

1-

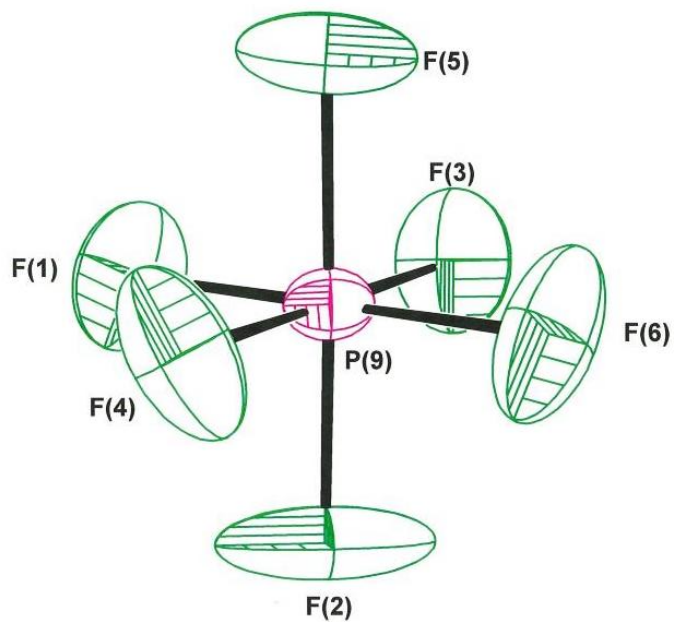

**Figure S60.** Thermal ellipsoid plot at the 50% probability level of anion 1 of  $[\text{PF}_6]^{1-}$ .

1-

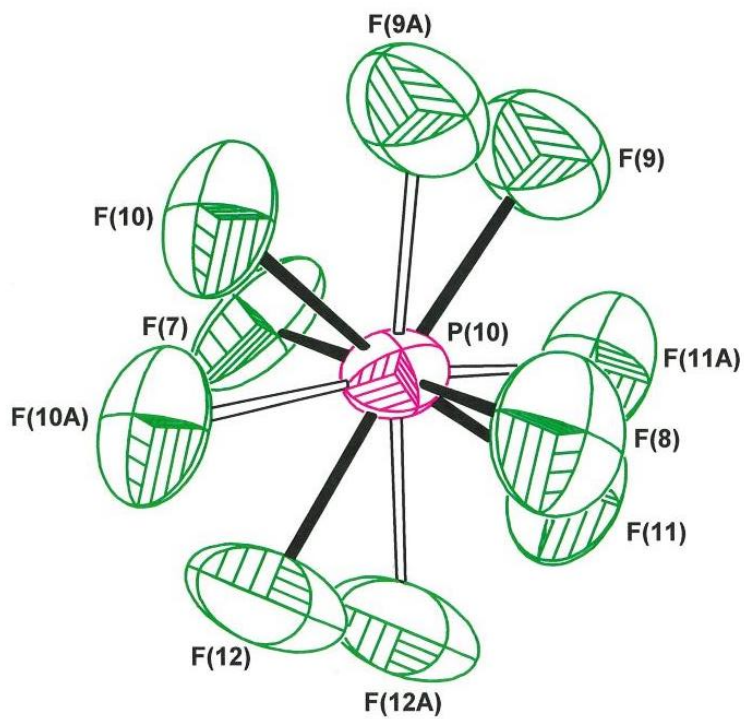

**Figure S61.** Thermal ellipsoid plot at the 50% probability level of anion 2 of  $[\text{PF}_6]^{1-}$ .

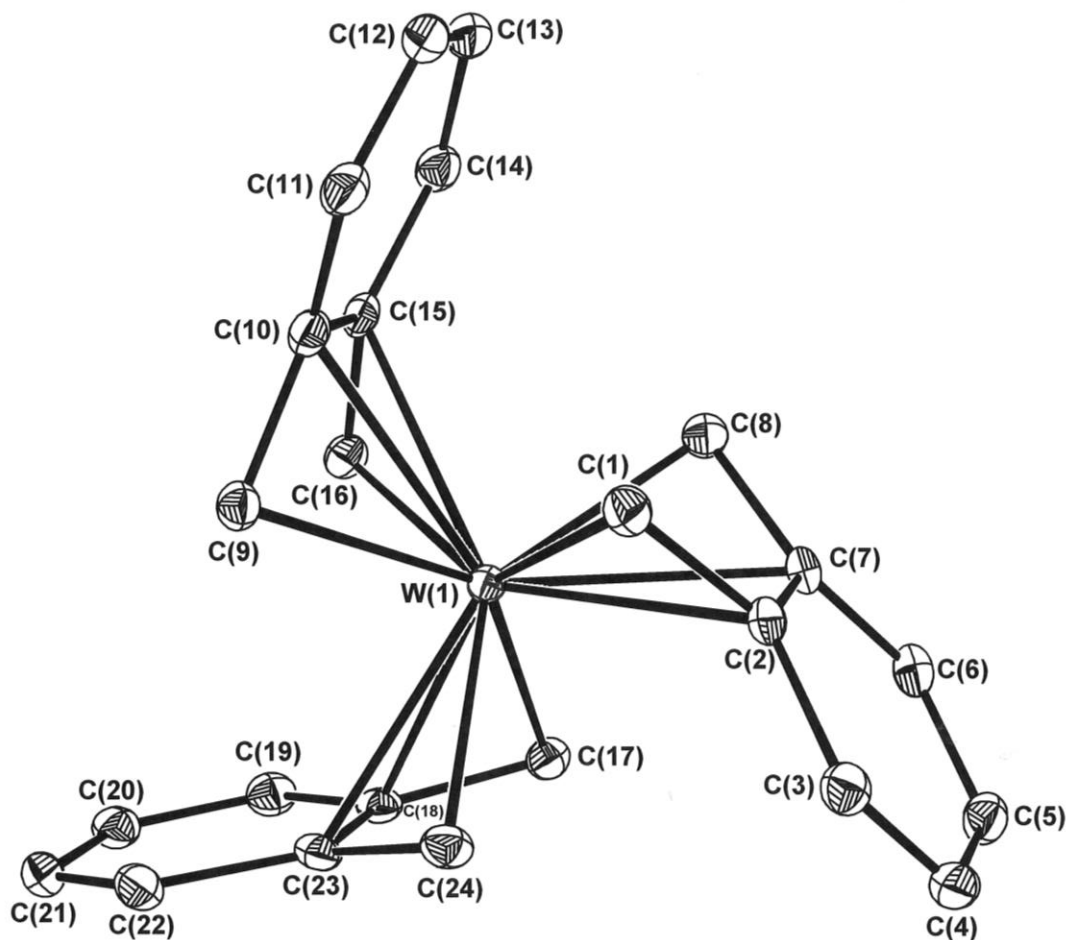

**Figure S62.** Thermal ellipsoid plot of [W(*o*-(CH<sub>2</sub>)<sub>2</sub>C<sub>6</sub>H<sub>4</sub>)<sub>3</sub>] drawn at the 50% probability level. All hydrogen atoms are omitted for clarity.
